# Supplementary material for: Physicochemical properties and plastic crystal structures of phosphonium fluorohydrogenate salts
Source: Royal Society of Chemistry journal article supplement (doi:10.1039/c1cp20285e), 2011-01-01
Supplement: c1cp20285e.pdf [file c1cp20285e.pdf]

**Supporting Information**

Physicochemical properties and plastic crystal  
structures of phosphonium fluorohydrogenate salts

*Takeshi Enomoto,<sup>a</sup> Shunsuke Kanematsu,<sup>a</sup> Katsuhiko Tsunashima,<sup>b</sup> Kazuhiko Matsumoto,<sup>\*a</sup> Rika  
Hagiwara<sup>a</sup>*

<sup>a</sup> Graduate School of Energy Science, Kyoto University, Yoshida, Sakyo-ku, Kyoto 606-8501, Japan

<sup>b</sup> Department of Materials Science, Wakayama National College of Technology, 77 Nada-cho, Noshima,  
Gobo 644-0023, Japan

\* E-mail: k-matsumoto@energy.kyoto-u.ac.jp

**Table S1.** Results of elemental analysis for  $P_{222m}(FH)_nF$  ( $m = 2, 5, 8,$  and  $101$ )

| Salt                            | Found |       |       | Calc. |       |       |
|---------------------------------|-------|-------|-------|-------|-------|-------|
|                                 | C / % | H / % | F / % | C / % | H / % | F / % |
| $P_{222(101)}(FH)_{2.1}F$       | 42.4  | 10.1  | 25.9  | 42.85 | 9.9   | 26.3  |
| $P_{2225}(FH)_{2.1}F$           | 52.5  | 11.3  | 23.4  | 52.8  | 11.3  | 23.5  |
| $P_{2228}(FH)_{2.1}F$           | 57.2  | 11.7  | 20.4  | 57.5  | 11.75 | 20.1  |
| $P_{2222}(FH)_2F(H_2O)_{0.5}^a$ | 44.8  | 10.6  | 26.15 | 44.6  | 10.8  | 26.5  |

<sup>a</sup> The sample absorbed moisture during the elemental analysis measurement due to the high hygroscopic property.

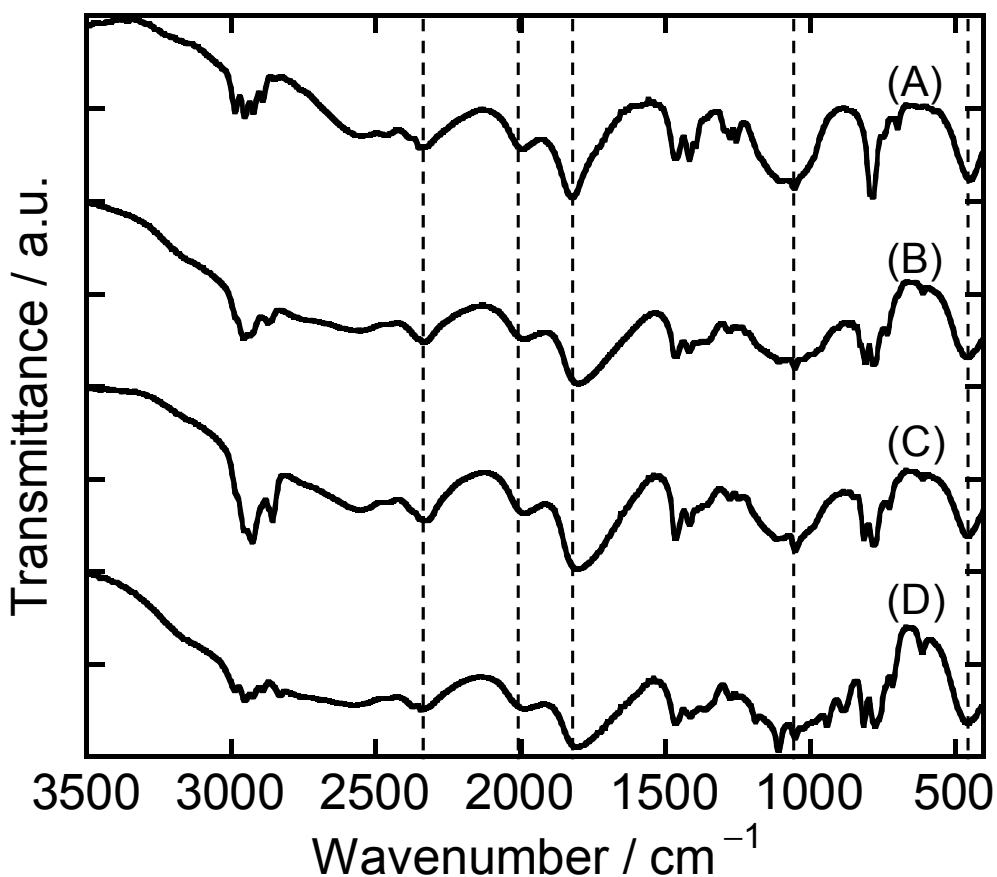

**Figure S1.** Infrared spectra of (A)  $P_{2222}(\text{FH})_2\text{F}$  (supercooled liquid), (B)  $P_{2225}(\text{FH})_{2.1}\text{F}$  (liquid), (C)  $P_{2228}(\text{FH})_{2.1}\text{F}$  (liquid), and (D)  $P_{222(101)}(\text{FH})_{2.1}\text{F}$  (liquid) at 25°C. The dashed lines denote the positions where the absorption bands of  $(\text{FH})_2\text{F}^-$ . [R. Hagiwara, Y. Nakamori, K. Matsumoto and Y. Ito, *J. Phys. Chem. B*, 2005, **109**, 5445-5449. F. Xu, K. Matsumoto and R. Hagiwara, *Chem.-Eur. J.*, 2010, **16**, 12970-12976.]  $(\text{FH})_2\text{F}^-$  :  $\tilde{\nu} = 2334$  (m), 1997 (m), 1820 (s), 1055 (w), 446 (s)  $\text{cm}^{-1}$  for  $P_{2222}(\text{FH})_2\text{F}$ ; 2336 (m), 1990 (m), 1801 (s), 1051 (w), 457 (s)  $\text{cm}^{-1}$  for  $P_{2225}(\text{FH})_{2.1}\text{F}$ ; 2327 (m), 1986 (m), 1804 (s), 1051 (w), 453 (s)  $\text{cm}^{-1}$  for  $P_{2228}(\text{FH})_{2.1}\text{F}$ ; 2345 (m), 1985 (m), 1804 (s), 1051 (w), 453 (s)  $\text{cm}^{-1}$  for  $P_{222(101)}(\text{FH})_{2.1}\text{F}$ . The symbols w, m, and s denote weak, medium, and strong, respectively.

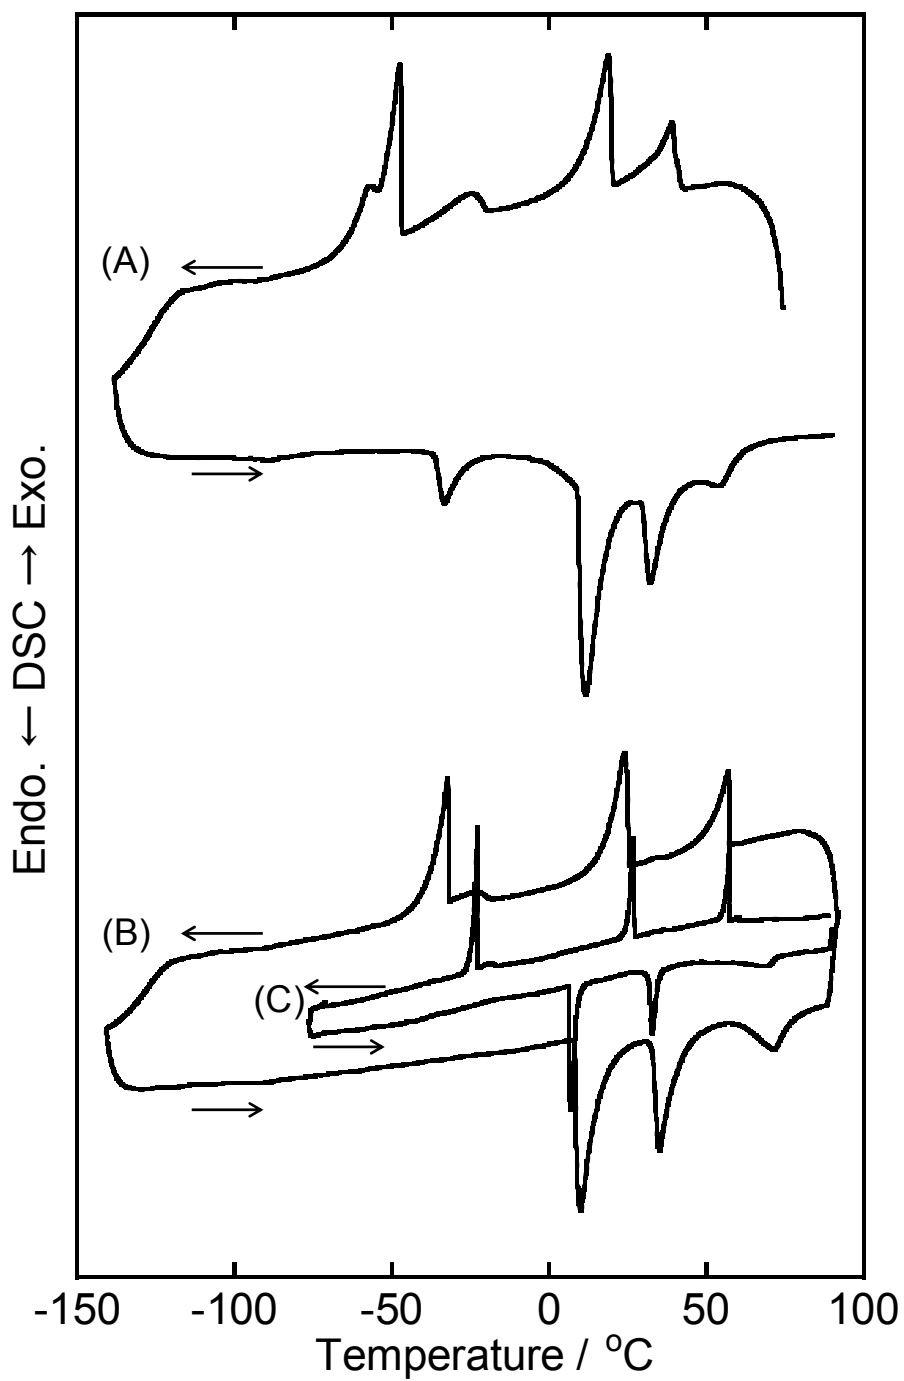

**Figure S2.** Differential scanning calorimetric curves for (A)  $P_{2222}(\text{FH})_{2.2}\text{F}$  ( $5^\circ\text{C min}^{-1}$ ), (B)  $P_{2222}(\text{FH})_2\text{F}$  ( $5^\circ\text{C min}^{-1}$ ), and (C)  $P_{2222}(\text{FH})_2\text{F}$  ( $1^\circ\text{C min}^{-1}$ ). Scan rates of  $1^\circ\text{C min}^{-1}$  and  $5^\circ\text{C min}^{-1}$  were used.

**Table S2.** Viscosities of  $P_{222m}(\text{FH})_{2.1}\text{Fs}$  ( $m = 5, 8, \text{ and } 101$ )

| $T / ^\circ\text{C}$ | $\eta / \text{cP}$                  |                                     |                                         |
|----------------------|-------------------------------------|-------------------------------------|-----------------------------------------|
|                      | $P_{2225}(\text{FH})_{2.1}\text{F}$ | $P_{2228}(\text{FH})_{2.1}\text{F}$ | $P_{222(101)}(\text{FH})_{2.1}\text{F}$ |
| 5                    | 72                                  | 120                                 | 22                                      |
| 15                   | 46                                  | 75                                  | 16                                      |
| 25                   | 28                                  | 47                                  | 11                                      |
| 35                   | 20                                  | 31                                  | 8.6                                     |
| 45                   | 15                                  | 22                                  | 6.7                                     |
| 55                   | 11                                  | 16                                  | 5.4                                     |
| 65                   | 8.5                                 | 12                                  | 4.4                                     |

**Table S3.** Conductivities of  $P_{222m}(\text{FH})_{2,1}\text{Fs}$  ( $m = 5, 8, \text{ and } 101$ )

| $T / ^\circ\text{C}$ | $\sigma / \text{mS cm}^{-1}$        |                                     |                                     |                                         |
|----------------------|-------------------------------------|-------------------------------------|-------------------------------------|-----------------------------------------|
|                      | $P_{2222}(\text{FH})_{2,1}\text{F}$ | $P_{2225}(\text{FH})_{2,1}\text{F}$ | $P_{2228}(\text{FH})_{2,1}\text{F}$ | $P_{222(101)}(\text{FH})_{2,1}\text{F}$ |
| 5                    | -                                   | 5.87                                | 2.65                                | 26.7                                    |
| 10                   | -                                   | -                                   | -                                   | -                                       |
| 15                   | 0.0051                              | 8.69                                | 4.11                                | 34.6                                    |
| 20                   | 0.014                               | -                                   | -                                   | -                                       |
| 25                   | 0.025                               | 12.4                                | 6.10                                | 43.9                                    |
| 30                   | 0.038                               | -                                   | -                                   | -                                       |
| 35                   | 1.30                                | 17.2                                | 8.60                                | 53.9                                    |
| 40                   | 2.70                                | -                                   | -                                   | -                                       |
| 45                   | 3.64                                | 24.1                                | 11.6                                | 64.9                                    |
| 50                   | 4.76                                | -                                   | -                                   | -                                       |
| 55                   | 6.47                                | 30.7                                | 15.2                                | 76.7                                    |
| 60                   | 10.8                                | -                                   | -                                   | -                                       |
| 65                   | 23.8                                | 38.5                                | 19.4                                | 89.3                                    |
| 70                   | 62.5                                | -                                   | -                                   | -                                       |
| 75                   | 99.0                                | -                                   | -                                   | -                                       |
| 80                   | 106.0                               | -                                   | -                                   | -                                       |
| 85                   | 113.0                               | -                                   | -                                   | -                                       |
| 90                   | 120.2                               | -                                   | -                                   | -                                       |
| 95                   | 127.3                               | -                                   | -                                   | -                                       |

**Table S4.** X-ray powder diffraction data for P<sub>2222</sub>(FH)<sub>2</sub>F at -10°C, 10°C, and 35°C

| $2\theta$ / deg. | $d$ / Å | Relative intensity |
|------------------|---------|--------------------|
| -10°C            |         |                    |
| 6.45             | 6.32    | 100                |
| 7.01             | 5.81    | 74                 |
| 7.63             | 5.34    | 26                 |
| 8.08             | 5.04    | 49                 |
| 10.61            | 3.84    | 87                 |
| 11.44            | 3.57    | 63                 |
| 12.80            | 3.19    | 45                 |
| 13.53            | 3.02    | 63                 |
| 14.25            | 2.87    | 19                 |
| 15.33            | 2.66    | 35                 |
| 16.79            | 2.43    | 32                 |
| 17.46            | 2.34    | 27                 |
| 18.65            | 2.19    | 22                 |
| 19.81            | 2.07    | 22                 |
| 21.48            | 1.91    | 17                 |
| 22.50            | 1.82    | 20                 |
| 23.59            | 1.74    | 15                 |
| 10°C             |         |                    |
| 5.94             | 6.86    | 40                 |
| 6.94             | 5.87    | 100                |
| 9.23             | 4.38    | 20                 |
| 10.08            | 4.05    | 24                 |
| 12.26            | 3.33    | 82                 |
| 13.70            | 2.98    | 16                 |
| 16.14            | 2.53    | 18                 |
| 17.53            | 2.33    | 15                 |
| 18.86            | 2.17    | 15                 |
| 21.39            | 1.92    | 13                 |

| 35°C  |      |     |
|-------|------|-----|
| 5.88  | 6.93 | 67  |
| 6.82  | 5.97 | 100 |
| 9.05  | 4.50 | 18  |
| 10.17 | 4.01 | 23  |
| 11.77 | 3.47 | 31  |
| 12.24 | 3.33 | 29  |
| 13.58 | 3.01 | 22  |
| 15.68 | 2.61 | 16  |

---



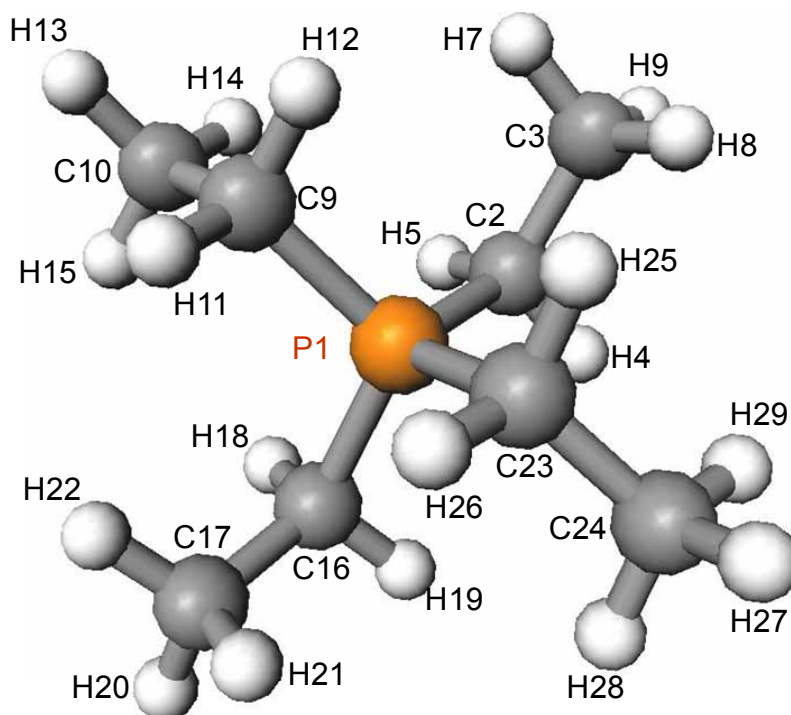

**Figure S3.** The optimized geometry of  $P_{2222}^+$  ( $D_{2d}$ ).

**Table S5.** Calculated geometrical parameters for  $P_{2222}^+$  ( $D_{2d}$ ) using cc-pVTZ basis set <sup>a, b</sup>

|           | HF    | B3LYP | PBE1PBE | MPW1PW91 | MP2   |
|-----------|-------|-------|---------|----------|-------|
| P1–C2     | 1.819 | 1.826 | 1.813   | 1.814    | 1.808 |
| C2–C3     | 1.532 | 1.532 | 1.524   | 1.524    | 1.529 |
| P1–C2–C3  | 115.4 | 115.2 | 114.6   | 114.9    | 113.5 |
| C2–P1–C9  | 110.7 | 110.4 | 110.3   | 110.4    | 110.0 |
| C2–P1–C16 | 107.0 | 107.6 | 107.8   | 107.7    | 108.4 |

<sup>a</sup> Bond lengths and angles are given in Å and deg., respectively. <sup>b</sup> Symbol of atoms are shown in Figure S3.

**Table S6.** Calculated volumes for optimized  $P_{2222}^+$  ( $D_{2d}$ ) using cc-pVTZ basis set <sup>a</sup>

| HF  | B3LYP | PBE1PBE | MPW1PW91 | MP2 |
|-----|-------|---------|----------|-----|
| 228 | 236   | 231     | 224      | 231 |

<sup>a</sup> Volumes are given in Å<sup>3</sup>.

**Table S7.** Calculated frequencies and intensities for  $P_{2222}^+ (D_{2d})$  using cc-pVTZ basis set <sup>a</sup>

| Mode* | Representation | HF       | B3LYP    | PBE1PBE  | MPW1PW91 | MP2      |
|-------|----------------|----------|----------|----------|----------|----------|
| 1     | B <sub>1</sub> | 62[0]    | 54[0]    | 46[0]    | 50[0]    | 35[0]    |
| 2,3   | E              | 79[<1]   | 70[<1]   | 67[<1]   | 69[<1]   | 65[<1]   |
| 4     | A <sub>2</sub> | 103[0]   | 98[0]    | 98[0]    | 97[0]    | 100[0]   |
| 5     | A <sub>1</sub> | 122[0]   | 110[0]   | 111[0]   | 110[0]   | 115[0]   |
| 6     | B <sub>2</sub> | 178[2]   | 161[1]   | 160[1]   | 159[1]   | 164[1]   |
| 7,8   | E              | 191[<1]  | 171[<1]  | 173[<1]  | 171[<1]  | 184[<1]  |
| 9     | B <sub>1</sub> | 207[0]   | 183[0]   | 188[0]   | 185[0]   | 204[0]   |
| 10    | A <sub>2</sub> | 260[0]   | 232[0]   | 236[0]   | 233[0]   | 253[0]   |
| 11,12 | E              | 263[<1]  | 240[0]   | 241[<1]  | 239[<1]  | 253[<1]  |
| 13    | B <sub>1</sub> | 271[0]   | 255[0]   | 256[0]   | 256[0]   | 259[0]   |
| 14    | A <sub>1</sub> | 343[0]   | 320[0]   | 322[0]   | 322[0]   | 324[0]   |
| 15    | B <sub>2</sub> | 345[2]   | 321[2]   | 326[2]   | 325[2]   | 329[2]   |
| 16,17 | E              | 410[5]   | 383[3]   | 379[3]   | 380[3]   | 378[3]   |
| 18    | A <sub>1</sub> | 623[0]   | 584[0]   | 605[0]   | 602[0]   | 616[0]   |
| 19    | A <sub>2</sub> | 740[0]   | 691[0]   | 679[0]   | 682[0]   | 683[0]   |
| 20,21 | E              | 724[1]   | 675[1]   | 696[<1]  | 693[<1]  | 712[<1]  |
| 22    | B <sub>1</sub> | 820[0]   | 765[0]   | 758[0]   | 760[0]   | 763[0]   |
| 23,24 | E              | 832[36]  | 777[40]  | 776[45]  | 777[45]  | 785[42]  |
| 25    | B <sub>2</sub> | 830[28]  | 768[32]  | 789[35]  | 787[35]  | 803[32]  |
| 26    | A <sub>2</sub> | 1058[0]  | 986[0]   | 975[0]   | 980[0]   | 982[0]   |
| 27,28 | E              | 1040[4]  | 981[<1]  | 987[2]   | 991[1]   | 993[1]   |
| 29    | A <sub>1</sub> | 1043[0]  | 984[0]   | 997[0]   | 998[0]   | 1001[0]  |
| 30    | B <sub>2</sub> | 1056[<1] | 995[<1]  | 1014[<1] | 1014[<1] | 1019[<1] |
| 31,32 | E              | 1091[3]  | 1014[5]  | 1020[<1] | 1021[1]  | 1024[1]  |
| 33    | B <sub>1</sub> | 1139[0]  | 1056[0]  | 1047[0]  | 1052[0]  | 1053[0]  |
| 34,35 | E              | 1150[50] | 1065[42] | 1063[47] | 1066[47] | 1067[48] |
| 36    | B <sub>2</sub> | 1158[1]  | 1073[<1] | 1079[<1] | 1080[<1] | 1081[1]  |
| 37    | A <sub>1</sub> | 1159[0]  | 1076[0]  | 1086[0]  | 1086[0]  | 1089[0]  |
| 38    | A <sub>2</sub> | 1364[0]  | 1262[0]  | 1254[0]  | 1260[0]  | 1261[0]  |
| 39    | B <sub>1</sub> | 1372[0]  | 1270[0]  | 1262[0]  | 1268[0]  | 1270[0]  |

---

|       |                |          |          |          |          |          |
|-------|----------------|----------|----------|----------|----------|----------|
| 40,41 | E              | 1380[1]  | 1275[2]  | 1267[1]  | 1273[2]  | 1273[1]  |
| 42    | B <sub>2</sub> | 1421[5]  | 1301[2]  | 1292[1]  | 1298[1]  | 1293[1]  |
| 43,44 | E              | 1424[2]  | 1303[1]  | 1297[3]  | 1302[3]  | 1300[4]  |
| 45    | A <sub>1</sub> | 1444[0]  | 1322[0]  | 1313[0]  | 1319[0]  | 1313[0]  |
| 46    | A <sub>1</sub> | 1548[0]  | 1432[0]  | 1418[0]  | 1426[0]  | 1424[0]  |
| 47,48 | E              | 1548[<1] | 1430[3]  | 1419[5]  | 1426[4]  | 1425[3]  |
| 49    | B <sub>2</sub> | 1550[1]  | 1429[1]  | 1419[2]  | 1426[1]  | 1425[2]  |
| 50,51 | E              | 1573[1]  | 1454[1]  | 1439[<1] | 1447[<1] | 1452[<1] |
| 52    | A <sub>1</sub> | 1585[0]  | 1464[0]  | 1452[0]  | 1459[0]  | 1464[0]  |
| 53    | B <sub>2</sub> | 1587[48] | 1469[54] | 1455[67] | 1463[64] | 1466[60] |
| 54    | B <sub>2</sub> | 1613[5]  | 1498[7]  | 1488[6]  | 1496[6]  | 1510[4]  |
| 55,56 | E              | 1616[4]  | 1501[5]  | 1491[6]  | 1499[6]  | 1513[6]  |
| 57    | A <sub>1</sub> | 1621[0]  | 1507[0]  | 1497[0]  | 1505[0]  | 1518[0]  |
| 58    | A <sub>2</sub> | 1621[0]  | 1505[0]  | 1496[0]  | 1503[0]  | 1519[0]  |
| 59    | B <sub>1</sub> | 1623[0]  | 1508[0]  | 1499[0]  | 1506[0]  | 1522[0]  |
| 60,61 | E              | 1624[17] | 1508[18] | 1500[20] | 1507[20] | 1523[19] |
| 62,63 | E              | 3181[10] | 3044[2]  | 3061[1]  | 3068[2]  | 3086[1]  |
| 64    | B <sub>2</sub> | 3180[13] | 3045[4]  | 3062[7]  | 3069[6]  | 3086[8]  |
| 65    | A <sub>1</sub> | 3181[0]  | 3048[0]  | 3064[0]  | 3070[0]  | 3087[0]  |
| 66    | A <sub>1</sub> | 3191[0]  | 3050[0]  | 3066[0]  | 3073[0]  | 3089[0]  |
| 67,68 | E              | 3185[11] | 3050[13] | 3066[12] | 3073[12] | 3091[10] |
| 69    | B <sub>2</sub> | 3192[7]  | 3054[8]  | 3070[5]  | 3076[6]  | 3095[4]  |
| 70    | B <sub>1</sub> | 3219[0]  | 3079[0]  | 3104[0]  | 3109[0]  | 3138[0]  |
| 71    | A <sub>2</sub> | 3224[0]  | 3082[0]  | 3106[0]  | 3111[0]  | 3141[0]  |
| 72,73 | E              | 3226[1]  | 3084[<1] | 3108[1]  | 3113[<1] | 3142[1]  |
| 74    | A <sub>2</sub> | 3246[0]  | 3115[0]  | 3141[0]  | 3147[0]  | 3178[0]  |
| 75,76 | E              | 3251[43] | 3117[21] | 3142[16] | 3148[17] | 3179[12] |
| 77    | B <sub>1</sub> | 3253[0]  | 3118[0]  | 3143[0]  | 3149[0]  | 3180[0]  |
| 78    | A <sub>1</sub> | 3255[0]  | 3118[0]  | 3145[0]  | 3150[0]  | 3185[0]  |
| 79,80 | E              | 3255[1]  | 3118[1]  | 3146[<1] | 3151[<1] | 3186[<1] |
| 81    | B <sub>2</sub> | 3255[28] | 3118[12] | 3146[7]  | 3151[8]  | 3186[4]  |

---

<sup>a</sup> Frequencies are given in cm<sup>-1</sup>. Values in square brackets are IR intensities (km mol<sup>-1</sup>). \* Modes correspond to the extracted Gaussian result files shown at the end of SI.

---

\* Calculated frequency and vibrational modes of  $P_{2222}^+$  in Gaussian output file at MP2/cc-pVTZ

level.

|             | 1  |         |       | 2     |         |       | 3     |         |       |       |
|-------------|----|---------|-------|-------|---------|-------|-------|---------|-------|-------|
|             | B1 |         |       | E     |         |       | E     |         |       |       |
| Frequencies | -- | 35.0753 |       |       | 64.7721 |       |       | 64.7722 |       |       |
| Red. masses | -- | 2.5065  |       |       | 2.4271  |       |       | 2.4271  |       |       |
| Frc consts  | -- | 0.0018  |       |       | 0.0060  |       |       | 0.0060  |       |       |
| IR Inten    | -- | 0.0000  |       |       | 0.3816  |       |       | 0.3816  |       |       |
| Atom AN     | X  | Y       | Z     | X     | Y       | Z     | X     | Y       | Z     |       |
| 1           | 15 | 0.00    | 0.00  | 0.00  | -0.02   | -0.06 | 0.00  | -0.06   | 0.02  | 0.00  |
| 2           | 6  | 0.01    | 0.00  | 0.00  | -0.01   | -0.06 | 0.00  | -0.03   | 0.02  | 0.00  |
| 3           | 6  | 0.18    | 0.00  | 0.00  | 0.07    | -0.07 | -0.01 | 0.21    | 0.02  | 0.00  |
| 4           | 1  | -0.06   | 0.07  | -0.08 | -0.04   | -0.03 | -0.03 | -0.12   | 0.11  | -0.11 |
| 5           | 1  | -0.06   | -0.07 | 0.08  | -0.04   | -0.09 | 0.04  | -0.12   | -0.08 | 0.11  |
| 6           | 1  | 0.17    | 0.00  | 0.00  | 0.05    | -0.06 | -0.02 | 0.16    | 0.02  | 0.01  |
| 7           | 1  | 0.26    | -0.06 | 0.10  | 0.11    | -0.10 | 0.04  | 0.33    | -0.05 | 0.16  |
| 8           | 1  | 0.26    | 0.06  | -0.10 | 0.11    | -0.05 | -0.06 | 0.33    | 0.10  | -0.15 |
| 9           | 6  | 0.00    | 0.01  | 0.00  | -0.02   | -0.03 | 0.00  | -0.06   | 0.01  | 0.00  |
| 10          | 6  | 0.00    | 0.18  | 0.00  | -0.02   | 0.21  | 0.00  | -0.07   | -0.07 | 0.01  |
| 11          | 1  | 0.07    | -0.06 | 0.08  | 0.08    | -0.12 | 0.11  | -0.09   | 0.04  | -0.04 |
| 12          | 1  | -0.07   | -0.06 | -0.08 | -0.11   | -0.12 | -0.11 | -0.03   | 0.04  | 0.03  |
| 13          | 1  | 0.00    | 0.17  | 0.00  | -0.02   | 0.16  | 0.01  | -0.06   | -0.05 | 0.02  |
| 14          | 1  | -0.06   | 0.26  | -0.10 | -0.10   | 0.33  | -0.15 | -0.05   | -0.11 | 0.06  |
| 15          | 1  | 0.06    | 0.26  | 0.10  | 0.05    | 0.33  | 0.16  | -0.10   | -0.11 | -0.04 |
| 16          | 6  | -0.01   | 0.00  | 0.00  | -0.01   | -0.06 | 0.00  | -0.03   | 0.02  | 0.00  |
| 17          | 6  | -0.18   | 0.00  | 0.00  | 0.07    | -0.07 | 0.01  | 0.21    | 0.02  | 0.00  |
| 18          | 1  | 0.06    | -0.07 | -0.08 | -0.04   | -0.03 | 0.03  | -0.12   | 0.11  | 0.11  |
| 19          | 1  | 0.06    | 0.07  | 0.08  | -0.04   | -0.09 | -0.04 | -0.12   | -0.08 | -0.11 |
| 20          | 1  | -0.17   | 0.00  | 0.00  | 0.05    | -0.06 | 0.02  | 0.16    | 0.02  | -0.01 |
| 21          | 1  | -0.26   | 0.06  | 0.10  | 0.11    | -0.10 | -0.04 | 0.33    | -0.05 | -0.16 |
| 22          | 1  | -0.26   | -0.06 | -0.10 | 0.11    | -0.05 | 0.06  | 0.33    | 0.10  | 0.15  |
| 23          | 6  | 0.00    | -0.01 | 0.00  | -0.02   | -0.03 | 0.00  | -0.06   | 0.01  | 0.00  |
| 24          | 6  | 0.00    | -0.18 | 0.00  | -0.02   | 0.21  | 0.00  | -0.07   | -0.07 | -0.01 |
| 25          | 1  | -0.07   | 0.06  | 0.08  | 0.08    | -0.12 | -0.11 | -0.09   | 0.04  | 0.04  |
| 26          | 1  | 0.07    | 0.06  | -0.08 | -0.11   | -0.12 | 0.11  | -0.03   | 0.04  | -0.03 |
| 27          | 1  | 0.00    | -0.17 | 0.00  | -0.02   | 0.16  | -0.01 | -0.06   | -0.05 | -0.02 |
| 28          | 1  | 0.06    | -0.26 | -0.10 | -0.10   | 0.33  | 0.15  | -0.05   | -0.11 | -0.06 |
| 29          | 1  | -0.06   | -0.26 | 0.10  | 0.05    | 0.33  | -0.16 | -0.10   | -0.11 | 0.04  |

| 4           |    |         |       | 5     |          |       | 6     |          |       |       |
|-------------|----|---------|-------|-------|----------|-------|-------|----------|-------|-------|
| A2          |    |         |       | A1    |          |       | B2    |          |       |       |
| Frequencies | -- | 99.9810 |       |       | 114.8811 |       |       | 163.8619 |       |       |
| Red. masses | -- | 1.3940  |       |       | 3.0021   |       |       | 3.1220   |       |       |
| Frc consts  | -- | 0.0082  |       |       | 0.0233   |       |       | 0.0494   |       |       |
| IR Inten    | -- | 0.0000  |       |       | 0.0000   |       |       | 1.4708   |       |       |
| Atom AN     |    | X       | Y     | Z     | X        | Y     | Z     | X        | Y     | Z     |
| 1           | 15 | 0.00    | 0.00  | 0.00  | 0.00     | 0.00  | 0.00  | 0.00     | 0.00  | 0.17  |
| 2           | 6  | -0.08   | 0.00  | 0.00  | 0.00     | -0.05 | 0.07  | 0.00     | 0.07  | 0.06  |
| 3           | 6  | 0.04    | 0.00  | 0.00  | 0.00     | 0.02  | 0.19  | 0.00     | -0.04 | -0.14 |
| 4           | 1  | -0.17   | 0.02  | -0.11 | 0.00     | -0.11 | 0.06  | 0.00     | 0.16  | 0.07  |
| 5           | 1  | -0.17   | -0.02 | 0.11  | 0.00     | -0.11 | 0.06  | 0.00     | 0.16  | 0.07  |
| 6           | 1  | -0.14   | 0.00  | 0.00  | 0.00     | -0.04 | 0.28  | 0.00     | 0.07  | -0.26 |
| 7           | 1  | 0.18    | 0.03  | 0.20  | 0.00     | 0.08  | 0.20  | 0.00     | -0.14 | -0.15 |
| 8           | 1  | 0.18    | -0.03 | -0.20 | 0.00     | 0.08  | 0.20  | 0.00     | -0.14 | -0.15 |
| 9           | 6  | 0.00    | 0.08  | 0.00  | -0.05    | 0.00  | -0.07 | -0.07    | 0.00  | 0.06  |
| 10          | 6  | 0.00    | -0.04 | 0.00  | 0.02     | 0.00  | -0.19 | 0.04     | 0.00  | -0.14 |
| 11          | 1  | -0.02   | 0.17  | -0.11 | -0.11    | 0.00  | -0.06 | -0.16    | 0.00  | 0.07  |
| 12          | 1  | 0.02    | 0.17  | 0.11  | -0.11    | 0.00  | -0.06 | -0.16    | 0.00  | 0.07  |
| 13          | 1  | 0.00    | 0.14  | 0.00  | -0.04    | 0.00  | -0.28 | -0.07    | 0.00  | -0.26 |
| 14          | 1  | -0.03   | -0.18 | 0.20  | 0.08     | 0.00  | -0.20 | 0.14     | 0.00  | -0.15 |
| 15          | 1  | 0.03    | -0.18 | -0.20 | 0.08     | 0.00  | -0.20 | 0.14     | 0.00  | -0.15 |
| 16          | 6  | 0.08    | 0.00  | 0.00  | 0.00     | 0.05  | 0.07  | 0.00     | -0.07 | 0.06  |
| 17          | 6  | -0.04   | 0.00  | 0.00  | 0.00     | -0.02 | 0.19  | 0.00     | 0.04  | -0.14 |
| 18          | 1  | 0.17    | -0.02 | -0.11 | 0.00     | 0.11  | 0.06  | 0.00     | -0.16 | 0.07  |
| 19          | 1  | 0.17    | 0.02  | 0.11  | 0.00     | 0.11  | 0.06  | 0.00     | -0.16 | 0.07  |
| 20          | 1  | 0.14    | 0.00  | 0.00  | 0.00     | 0.04  | 0.28  | 0.00     | -0.07 | -0.26 |
| 21          | 1  | -0.18   | -0.03 | 0.20  | 0.00     | -0.08 | 0.20  | 0.00     | 0.14  | -0.15 |
| 22          | 1  | -0.18   | 0.03  | -0.20 | 0.00     | -0.08 | 0.20  | 0.00     | 0.14  | -0.15 |
| 23          | 6  | 0.00    | -0.08 | 0.00  | 0.05     | 0.00  | -0.07 | 0.07     | 0.00  | 0.06  |
| 24          | 6  | 0.00    | 0.04  | 0.00  | -0.02    | 0.00  | -0.19 | -0.04    | 0.00  | -0.14 |
| 25          | 1  | 0.02    | -0.17 | -0.11 | 0.11     | 0.00  | -0.06 | 0.16     | 0.00  | 0.07  |
| 26          | 1  | -0.02   | -0.17 | 0.11  | 0.11     | 0.00  | -0.06 | 0.16     | 0.00  | 0.07  |
| 27          | 1  | 0.00    | -0.14 | 0.00  | 0.04     | 0.00  | -0.28 | 0.07     | 0.00  | -0.26 |
| 28          | 1  | 0.03    | 0.18  | 0.20  | -0.08    | 0.00  | -0.20 | -0.14    | 0.00  | -0.15 |
| 29          | 1  | -0.03   | 0.18  | -0.20 | -0.08    | 0.00  | -0.20 | -0.14    | 0.00  | -0.15 |

|             | 7  |          |       | 8     |          |       | 9     |          |       |
|-------------|----|----------|-------|-------|----------|-------|-------|----------|-------|
|             | E  |          |       | E     |          |       | B1    |          |       |
| Frequencies | -- | 184.3657 |       |       | 184.3657 |       |       | 204.4023 |       |
| Red. masses | -- | 1.3425   |       |       | 1.3425   |       |       | 1.1917   |       |
| Frc consts  | -- | 0.0269   |       |       | 0.0269   |       |       | 0.0293   |       |
| IR Inten    | -- | 0.0544   |       |       | 0.0544   |       |       | 0.0000   |       |
| Atom AN     | X  | Y        | Z     | X     | Y        | Z     | X     | Y        | Z     |
| 1           | 15 | 0.00     | -0.03 | 0.00  | -0.03    | 0.00  | 0.00  | 0.00     | 0.00  |
| 2           | 6  | -0.01    | -0.02 | -0.01 | 0.07     | 0.00  | 0.00  | -0.06    | 0.00  |
| 3           | 6  | -0.01    | -0.05 | -0.06 | 0.03     | -0.01 | -0.01 | -0.03    | 0.00  |
| 4           | 1  | -0.02    | 0.00  | -0.02 | 0.14     | 0.03  | 0.10  | -0.11    | -0.02 |
| 5           | 1  | -0.02    | 0.01  | 0.01  | 0.14     | -0.03 | -0.10 | -0.11    | 0.02  |
| 6           | 1  | -0.06    | -0.02 | -0.10 | 0.38     | 0.00  | -0.02 | -0.28    | 0.00  |
| 7           | 1  | 0.03     | -0.06 | -0.02 | -0.15    | -0.14 | -0.29 | 0.11     | 0.09  |
| 8           | 1  | 0.03     | -0.10 | -0.11 | -0.15    | 0.12  | 0.27  | 0.11     | -0.09 |
| 9           | 6  | 0.00     | 0.07  | 0.00  | -0.02    | 0.01  | 0.01  | 0.00     | -0.06 |
| 10          | 6  | 0.01     | 0.03  | -0.01 | -0.05    | 0.01  | 0.06  | 0.00     | -0.03 |
| 11          | 1  | 0.03     | 0.14  | -0.10 | 0.01     | 0.02  | -0.01 | -0.02    | -0.11 |
| 12          | 1  | -0.03    | 0.14  | 0.10  | 0.00     | 0.02  | 0.02  | 0.02     | -0.11 |
| 13          | 1  | 0.00     | 0.38  | -0.02 | -0.02    | 0.06  | 0.10  | 0.00     | -0.28 |
| 14          | 1  | -0.12    | -0.15 | 0.27  | -0.10    | -0.03 | 0.11  | 0.09     | 0.11  |
| 15          | 1  | 0.14     | -0.15 | -0.29 | -0.06    | -0.03 | 0.02  | -0.09    | 0.11  |
| 16          | 6  | -0.01    | -0.02 | 0.01  | 0.07     | 0.00  | 0.00  | 0.06     | 0.00  |
| 17          | 6  | -0.01    | -0.05 | 0.06  | 0.03     | -0.01 | 0.01  | 0.03     | 0.00  |
| 18          | 1  | -0.02    | 0.00  | 0.02  | 0.14     | 0.03  | -0.10 | 0.11     | 0.02  |
| 19          | 1  | -0.02    | 0.01  | -0.01 | 0.14     | -0.03 | 0.10  | 0.11     | -0.02 |
| 20          | 1  | -0.06    | -0.02 | 0.10  | 0.38     | 0.00  | 0.02  | 0.28     | 0.00  |
| 21          | 1  | 0.03     | -0.06 | 0.02  | -0.15    | -0.14 | 0.29  | -0.11    | -0.09 |
| 22          | 1  | 0.03     | -0.10 | 0.11  | -0.15    | 0.12  | -0.27 | -0.11    | 0.09  |
| 23          | 6  | 0.00     | 0.07  | 0.00  | -0.02    | 0.01  | -0.01 | 0.00     | 0.06  |
| 24          | 6  | 0.01     | 0.03  | 0.01  | -0.05    | 0.01  | -0.06 | 0.00     | 0.03  |
| 25          | 1  | 0.03     | 0.14  | 0.10  | 0.01     | 0.02  | 0.01  | 0.02     | 0.11  |
| 26          | 1  | -0.03    | 0.14  | -0.10 | 0.00     | 0.02  | -0.02 | -0.02    | 0.11  |
| 27          | 1  | 0.00     | 0.38  | 0.02  | -0.02    | 0.06  | -0.10 | 0.00     | 0.28  |
| 28          | 1  | -0.12    | -0.15 | -0.27 | -0.10    | -0.03 | -0.11 | -0.09    | -0.11 |
| 29          | 1  | 0.14     | -0.15 | 0.29  | -0.06    | -0.03 | -0.02 | 0.09     | -0.11 |

|             |    | 10       |       |       | 11       |       |       | 12       |       |       |
|-------------|----|----------|-------|-------|----------|-------|-------|----------|-------|-------|
|             |    | A2       |       |       | E        |       |       | E        |       |       |
| Frequencies | -- | 252.5025 |       |       | 252.5641 |       |       | 252.5641 |       |       |
| Red. masses | -- | 1.2990   |       |       | 1.6590   |       |       | 1.6590   |       |       |
| Frc consts  | -- | 0.0488   |       |       | 0.0623   |       |       | 0.0623   |       |       |
| IR Inten    | -- | 0.0000   |       |       | 0.0060   |       |       | 0.0060   |       |       |
| Atom AN     |    | X        | Y     | Z     | X        | Y     | Z     | X        | Y     | Z     |
| 1           | 15 | 0.00     | 0.00  | 0.00  | 0.01     | -0.01 | 0.00  | -0.01    | -0.01 | 0.00  |
| 2           | 6  | -0.08    | 0.00  | 0.00  | 0.09     | 0.02  | -0.03 | -0.08    | 0.02  | -0.03 |
| 3           | 6  | 0.02     | 0.00  | 0.00  | -0.01    | 0.06  | 0.04  | 0.01     | 0.07  | 0.05  |
| 4           | 1  | -0.12    | 0.02  | -0.05 | 0.15     | -0.02 | 0.05  | -0.13    | 0.01  | -0.09 |
| 5           | 1  | -0.12    | -0.02 | 0.05  | 0.14     | 0.02  | -0.10 | -0.14    | -0.02 | 0.04  |
| 6           | 1  | 0.31     | 0.00  | 0.00  | -0.27    | 0.02  | 0.09  | 0.24     | 0.02  | 0.11  |
| 7           | 1  | -0.08    | -0.16 | -0.16 | 0.07     | 0.24  | 0.19  | -0.06    | -0.02 | -0.07 |
| 8           | 1  | -0.08    | 0.16  | 0.16  | 0.07     | -0.05 | -0.09 | -0.07    | 0.24  | 0.18  |
| 9           | 6  | 0.00     | 0.08  | 0.00  | -0.02    | -0.08 | -0.03 | 0.02     | -0.09 | 0.03  |
| 10          | 6  | 0.00     | -0.02 | 0.00  | -0.07    | 0.01  | 0.05  | 0.06     | 0.01  | -0.04 |
| 11          | 1  | -0.02    | 0.12  | -0.05 | 0.02     | -0.14 | 0.04  | 0.02     | -0.14 | 0.10  |
| 12          | 1  | 0.02     | 0.12  | 0.05  | -0.01    | -0.13 | -0.09 | -0.02    | -0.15 | -0.05 |
| 13          | 1  | 0.00     | -0.31 | 0.00  | -0.02    | 0.24  | 0.11  | 0.02     | 0.27  | -0.09 |
| 14          | 1  | 0.16     | 0.08  | -0.16 | -0.24    | -0.07 | 0.18  | -0.05    | -0.07 | 0.09  |
| 15          | 1  | -0.16    | 0.08  | 0.16  | 0.02     | -0.06 | -0.07 | 0.24     | -0.07 | -0.19 |
| 16          | 6  | 0.08     | 0.00  | 0.00  | 0.09     | 0.02  | 0.03  | -0.08    | 0.02  | 0.03  |
| 17          | 6  | -0.02    | 0.00  | 0.00  | -0.01    | 0.06  | -0.04 | 0.01     | 0.07  | -0.05 |
| 18          | 1  | 0.12     | -0.02 | -0.05 | 0.15     | -0.02 | -0.05 | -0.13    | 0.01  | 0.09  |
| 19          | 1  | 0.12     | 0.02  | 0.05  | 0.14     | 0.02  | 0.10  | -0.14    | -0.02 | -0.04 |
| 20          | 1  | -0.31    | 0.00  | 0.00  | -0.27    | 0.02  | -0.09 | 0.24     | 0.02  | -0.11 |
| 21          | 1  | 0.08     | 0.16  | -0.16 | 0.07     | 0.24  | -0.19 | -0.06    | -0.02 | 0.07  |
| 22          | 1  | 0.08     | -0.16 | 0.16  | 0.07     | -0.05 | 0.09  | -0.07    | 0.24  | -0.18 |
| 23          | 6  | 0.00     | -0.08 | 0.00  | -0.02    | -0.08 | 0.03  | 0.02     | -0.09 | -0.03 |
| 24          | 6  | 0.00     | 0.02  | 0.00  | -0.07    | 0.01  | -0.05 | 0.06     | 0.01  | 0.04  |
| 25          | 1  | 0.02     | -0.12 | -0.05 | 0.02     | -0.14 | -0.04 | 0.02     | -0.14 | -0.10 |
| 26          | 1  | -0.02    | -0.12 | 0.05  | -0.01    | -0.13 | 0.09  | -0.02    | -0.15 | 0.05  |
| 27          | 1  | 0.00     | 0.31  | 0.00  | -0.02    | 0.24  | -0.11 | 0.02     | 0.27  | 0.09  |
| 28          | 1  | -0.16    | -0.08 | -0.16 | -0.24    | -0.07 | -0.18 | -0.05    | -0.07 | -0.09 |
| 29          | 1  | 0.16     | -0.08 | 0.16  | 0.02     | -0.06 | 0.07  | 0.24     | -0.07 | 0.19  |

|             |    | 13       |       |       | 14       |       |       | 15       |       |       |
|-------------|----|----------|-------|-------|----------|-------|-------|----------|-------|-------|
|             |    | B1       |       |       | A1       |       |       | B2       |       |       |
| Frequencies |    | 258.5844 |       |       | 323.7793 |       |       | 328.5200 |       |       |
| Red. masses |    | 1.5614   |       |       | 3.2743   |       |       | 3.4651   |       |       |
| Frc consts  |    | 0.0615   |       |       | 0.2022   |       |       | 0.2203   |       |       |
| IR Inten    |    | 0.0000   |       |       | 0.0000   |       |       | 1.6855   |       |       |
| Atom        | AN | X        | Y     | Z     | X        | Y     | Z     | X        | Y     | Z     |
| 1           | 15 | 0.00     | 0.00  | 0.00  | 0.00     | 0.00  | 0.00  | 0.00     | 0.00  | -0.05 |
| 2           | 6  | 0.11     | 0.00  | 0.00  | 0.00     | 0.11  | -0.07 | 0.00     | -0.13 | 0.04  |
| 3           | 6  | 0.01     | 0.00  | 0.00  | 0.00     | 0.19  | 0.01  | 0.00     | -0.19 | -0.01 |
| 4           | 1  | 0.21     | 0.01  | 0.13  | 0.00     | 0.12  | -0.07 | -0.01    | -0.15 | 0.03  |
| 5           | 1  | 0.21     | -0.01 | -0.13 | 0.00     | 0.12  | -0.07 | 0.01     | -0.15 | 0.03  |
| 6           | 1  | -0.21    | 0.00  | 0.00  | 0.00     | 0.10  | 0.12  | 0.00     | -0.12 | -0.09 |
| 7           | 1  | 0.07     | 0.13  | 0.11  | 0.00     | 0.26  | 0.03  | 0.00     | -0.25 | -0.02 |
| 8           | 1  | 0.07     | -0.13 | -0.11 | 0.00     | 0.26  | 0.03  | 0.00     | -0.25 | -0.02 |
| 9           | 6  | 0.00     | 0.11  | 0.00  | 0.11     | 0.00  | 0.07  | 0.13     | 0.00  | 0.04  |
| 10          | 6  | 0.00     | 0.01  | 0.00  | 0.19     | 0.00  | -0.01 | 0.19     | 0.00  | -0.01 |
| 11          | 1  | 0.01     | 0.21  | -0.13 | 0.12     | 0.00  | 0.07  | 0.15     | 0.01  | 0.03  |
| 12          | 1  | -0.01    | 0.21  | 0.13  | 0.12     | 0.00  | 0.07  | 0.15     | -0.01 | 0.03  |
| 13          | 1  | 0.00     | -0.21 | 0.00  | 0.10     | 0.00  | -0.12 | 0.12     | 0.00  | -0.09 |
| 14          | 1  | 0.13     | 0.07  | -0.11 | 0.26     | 0.00  | -0.03 | 0.25     | 0.00  | -0.02 |
| 15          | 1  | -0.13    | 0.07  | 0.11  | 0.26     | 0.00  | -0.03 | 0.25     | 0.00  | -0.02 |
| 16          | 6  | -0.11    | 0.00  | 0.00  | 0.00     | -0.11 | -0.07 | 0.00     | 0.13  | 0.04  |
| 17          | 6  | -0.01    | 0.00  | 0.00  | 0.00     | -0.19 | 0.01  | 0.00     | 0.19  | -0.01 |
| 18          | 1  | -0.21    | -0.01 | 0.13  | 0.00     | -0.12 | -0.07 | 0.01     | 0.15  | 0.03  |
| 19          | 1  | -0.21    | 0.01  | -0.13 | 0.00     | -0.12 | -0.07 | -0.01    | 0.15  | 0.03  |
| 20          | 1  | 0.21     | 0.00  | 0.00  | 0.00     | -0.10 | 0.12  | 0.00     | 0.12  | -0.09 |
| 21          | 1  | -0.07    | -0.13 | 0.11  | 0.00     | -0.26 | 0.03  | 0.00     | 0.25  | -0.02 |
| 22          | 1  | -0.07    | 0.13  | -0.11 | 0.00     | -0.26 | 0.03  | 0.00     | 0.25  | -0.02 |
| 23          | 6  | 0.00     | -0.11 | 0.00  | -0.11    | 0.00  | 0.07  | -0.13    | 0.00  | 0.04  |
| 24          | 6  | 0.00     | -0.01 | 0.00  | -0.19    | 0.00  | -0.01 | -0.19    | 0.00  | -0.01 |
| 25          | 1  | -0.01    | -0.21 | -0.13 | -0.12    | 0.00  | 0.07  | -0.15    | -0.01 | 0.03  |
| 26          | 1  | 0.01     | -0.21 | 0.13  | -0.12    | 0.00  | 0.07  | -0.15    | 0.01  | 0.03  |
| 27          | 1  | 0.00     | 0.21  | 0.00  | -0.10    | 0.00  | -0.12 | -0.12    | 0.00  | -0.09 |
| 28          | 1  | -0.13    | -0.07 | -0.11 | -0.26    | 0.00  | -0.03 | -0.25    | 0.00  | -0.02 |
| 29          | 1  | 0.13     | -0.07 | 0.11  | -0.26    | 0.00  | -0.03 | -0.25    | 0.00  | -0.02 |



|             |    | 16       |       |       | 17       |       |       | 18       |       |       |
|-------------|----|----------|-------|-------|----------|-------|-------|----------|-------|-------|
|             |    | E        |       |       | E        |       |       | A1       |       |       |
| Frequencies | -- | 378.0924 |       |       | 378.0924 |       |       | 616.4387 |       |       |
| Red. masses | -- | 2.4923   |       |       | 2.4923   |       |       | 3.1275   |       |       |
| Frc consts  | -- | 0.2099   |       |       | 0.2099   |       |       | 0.7002   |       |       |
| IR Inten    | -- | 3.1803   |       |       | 3.1803   |       |       | 0.0000   |       |       |
| Atom AN     |    | X        | Y     | Z     | X        | Y     | Z     | X        | Y     | Z     |
| 1           | 15 | 0.08     | 0.12  | 0.00  | 0.12     | -0.08 | 0.00  | 0.00     | 0.00  | 0.00  |
| 2           | 6  | -0.02    | 0.02  | 0.14  | -0.04    | -0.01 | -0.09 | 0.00     | 0.12  | 0.18  |
| 3           | 6  | -0.01    | -0.08 | -0.01 | -0.01    | 0.05  | 0.01  | 0.00     | 0.03  | 0.01  |
| 4           | 1  | -0.12    | -0.02 | 0.00  | -0.18    | -0.09 | -0.27 | -0.01    | 0.13  | 0.17  |
| 5           | 1  | -0.10    | 0.07  | 0.24  | -0.19    | 0.06  | 0.13  | 0.01     | 0.13  | 0.17  |
| 6           | 1  | 0.06     | 0.05  | -0.17 | 0.10     | -0.03 | 0.10  | 0.00     | 0.20  | -0.20 |
| 7           | 1  | -0.04    | -0.22 | -0.08 | -0.05    | 0.06  | -0.05 | -0.01    | -0.12 | -0.03 |
| 8           | 1  | -0.03    | -0.16 | 0.01  | -0.06    | 0.17  | 0.09  | 0.01     | -0.12 | -0.03 |
| 9           | 6  | 0.01     | -0.04 | -0.09 | 0.02     | 0.02  | -0.14 | 0.12     | 0.00  | -0.18 |
| 10          | 6  | -0.05    | -0.01 | 0.01  | -0.08    | 0.01  | 0.01  | 0.03     | 0.00  | -0.01 |
| 11          | 1  | -0.06    | -0.19 | 0.13  | 0.07     | 0.10  | -0.24 | 0.13     | -0.01 | -0.17 |
| 12          | 1  | 0.09     | -0.18 | -0.27 | -0.02    | 0.12  | 0.00  | 0.13     | 0.01  | -0.17 |
| 13          | 1  | 0.03     | 0.10  | 0.10  | 0.05     | -0.06 | 0.17  | 0.20     | 0.00  | 0.20  |
| 14          | 1  | -0.17    | -0.06 | 0.09  | -0.16    | 0.03  | -0.01 | -0.12    | -0.01 | 0.03  |
| 15          | 1  | -0.06    | -0.05 | -0.05 | -0.22    | 0.04  | 0.08  | -0.12    | 0.01  | 0.03  |
| 16          | 6  | -0.02    | 0.02  | -0.14 | -0.04    | -0.01 | 0.09  | 0.00     | -0.12 | 0.18  |
| 17          | 6  | -0.01    | -0.08 | 0.01  | -0.01    | 0.05  | -0.01 | 0.00     | -0.03 | 0.01  |
| 18          | 1  | -0.12    | -0.02 | 0.00  | -0.18    | -0.09 | 0.27  | 0.01     | -0.13 | 0.17  |
| 19          | 1  | -0.10    | 0.07  | -0.24 | -0.19    | 0.06  | -0.13 | -0.01    | -0.13 | 0.17  |
| 20          | 1  | 0.06     | 0.05  | 0.17  | 0.10     | -0.03 | -0.10 | 0.00     | -0.20 | -0.20 |
| 21          | 1  | -0.04    | -0.22 | 0.08  | -0.05    | 0.06  | 0.05  | 0.01     | 0.12  | -0.03 |
| 22          | 1  | -0.03    | -0.16 | -0.01 | -0.06    | 0.17  | -0.09 | -0.01    | 0.12  | -0.03 |
| 23          | 6  | 0.01     | -0.04 | 0.09  | 0.02     | 0.02  | 0.14  | -0.12    | 0.00  | -0.18 |
| 24          | 6  | -0.05    | -0.01 | -0.01 | -0.08    | 0.01  | -0.01 | -0.03    | 0.00  | -0.01 |
| 25          | 1  | -0.06    | -0.19 | -0.13 | 0.07     | 0.10  | 0.24  | -0.13    | 0.01  | -0.17 |
| 26          | 1  | 0.09     | -0.18 | 0.27  | -0.02    | 0.12  | 0.00  | -0.13    | -0.01 | -0.17 |
| 27          | 1  | 0.03     | 0.10  | -0.10 | 0.05     | -0.06 | -0.17 | -0.20    | 0.00  | 0.20  |
| 28          | 1  | -0.17    | -0.06 | -0.09 | -0.16    | 0.03  | 0.01  | 0.12     | 0.01  | 0.03  |
| 29          | 1  | -0.06    | -0.05 | 0.05  | -0.22    | 0.04  | -0.08 | 0.12     | -0.01 | 0.03  |

| 19          |    |          |       | 20    |          |       | 21    |          |       |       |
|-------------|----|----------|-------|-------|----------|-------|-------|----------|-------|-------|
| A2          |    |          |       | E     |          |       | E     |          |       |       |
| Frequencies | -- | 682.9121 |       |       | 711.6017 |       |       | 711.6017 |       |       |
| Red. masses | -- | 1.1734   |       |       | 2.0999   |       |       | 2.0999   |       |       |
| Frc consts  | -- | 0.3224   |       |       | 0.6265   |       |       | 0.6265   |       |       |
| IR Inten    | -- | 0.0000   |       |       | 0.0521   |       |       | 0.0521   |       |       |
| Atom AN     |    | X        | Y     | Z     | X        | Y     | Z     | X        | Y     | Z     |
| 1           | 15 | 0.00     | 0.00  | 0.00  | 0.04     | 0.09  | 0.00  | 0.09     | -0.04 | 0.00  |
| 2           | 6  | -0.06    | 0.00  | 0.00  | 0.03     | -0.08 | -0.13 | 0.07     | 0.04  | 0.06  |
| 3           | 6  | 0.00     | 0.00  | 0.00  | 0.00     | -0.05 | 0.00  | 0.01     | 0.02  | 0.00  |
| 4           | 1  | 0.15     | 0.01  | 0.27  | -0.06    | -0.11 | -0.26 | -0.14    | 0.05  | -0.22 |
| 5           | 1  | 0.15     | -0.01 | -0.27 | -0.07    | -0.10 | 0.01  | -0.13    | 0.06  | 0.34  |
| 6           | 1  | 0.05     | 0.00  | 0.00  | -0.03    | -0.17 | 0.15  | -0.06    | 0.08  | -0.07 |
| 7           | 1  | 0.07     | -0.11 | 0.09  | -0.03    | 0.12  | -0.02 | -0.08    | 0.10  | -0.11 |
| 8           | 1  | 0.07     | 0.11  | -0.09 | -0.04    | 0.00  | 0.07  | -0.07    | -0.16 | 0.09  |
| 9           | 6  | 0.00     | 0.06  | 0.00  | -0.04    | 0.07  | 0.06  | -0.08    | -0.03 | 0.13  |
| 10          | 6  | 0.00     | 0.00  | 0.00  | -0.02    | 0.01  | 0.00  | -0.05    | 0.00  | 0.00  |
| 11          | 1  | -0.01    | -0.15 | 0.27  | -0.06    | -0.13 | 0.34  | -0.10    | 0.07  | -0.01 |
| 12          | 1  | 0.01     | -0.15 | -0.27 | -0.05    | -0.14 | -0.22 | -0.11    | 0.06  | 0.26  |
| 13          | 1  | 0.00     | -0.05 | 0.00  | -0.08    | -0.06 | -0.07 | -0.17    | 0.03  | -0.15 |
| 14          | 1  | 0.11     | -0.07 | 0.09  | 0.16     | -0.07 | 0.09  | 0.00     | 0.04  | -0.07 |
| 15          | 1  | -0.11    | -0.07 | -0.09 | -0.10    | -0.08 | -0.11 | 0.12     | 0.03  | 0.02  |
| 16          | 6  | 0.06     | 0.00  | 0.00  | 0.03     | -0.08 | 0.13  | 0.07     | 0.04  | -0.06 |
| 17          | 6  | 0.00     | 0.00  | 0.00  | 0.00     | -0.05 | 0.00  | 0.01     | 0.02  | 0.00  |
| 18          | 1  | -0.15    | -0.01 | 0.27  | -0.06    | -0.11 | 0.26  | -0.14    | 0.05  | 0.22  |
| 19          | 1  | -0.15    | 0.01  | -0.27 | -0.07    | -0.10 | -0.01 | -0.13    | 0.06  | -0.34 |
| 20          | 1  | -0.05    | 0.00  | 0.00  | -0.03    | -0.17 | -0.15 | -0.06    | 0.08  | 0.07  |
| 21          | 1  | -0.07    | 0.11  | 0.09  | -0.03    | 0.12  | 0.02  | -0.08    | 0.10  | 0.11  |
| 22          | 1  | -0.07    | -0.11 | -0.09 | -0.04    | 0.00  | -0.07 | -0.07    | -0.16 | -0.09 |
| 23          | 6  | 0.00     | -0.06 | 0.00  | -0.04    | 0.07  | -0.06 | -0.08    | -0.03 | -0.13 |
| 24          | 6  | 0.00     | 0.00  | 0.00  | -0.02    | 0.01  | 0.00  | -0.05    | 0.00  | 0.00  |
| 25          | 1  | 0.01     | 0.15  | 0.27  | -0.06    | -0.13 | -0.34 | -0.10    | 0.07  | 0.01  |
| 26          | 1  | -0.01    | 0.15  | -0.27 | -0.05    | -0.14 | 0.22  | -0.11    | 0.06  | -0.26 |
| 27          | 1  | 0.00     | 0.05  | 0.00  | -0.08    | -0.06 | 0.07  | -0.17    | 0.03  | 0.15  |
| 28          | 1  | -0.11    | 0.07  | 0.09  | 0.16     | -0.07 | -0.09 | 0.00     | 0.04  | 0.07  |
| 29          | 1  | 0.11     | 0.07  | -0.09 | -0.10    | -0.08 | 0.11  | 0.12     | 0.03  | -0.02 |

|             | 22 |          |       | 23    |          |       | 24    |          |       |       |
|-------------|----|----------|-------|-------|----------|-------|-------|----------|-------|-------|
|             | B1 |          |       | E     |          |       | E     |          |       |       |
| Frequencies | -- | 763.1058 |       |       | 784.5704 |       |       | 784.5704 |       |       |
| Red. masses | -- | 1.2050   |       |       | 1.7316   |       |       | 1.7316   |       |       |
| Frc consts  | -- | 0.4134   |       |       | 0.6280   |       |       | 0.6280   |       |       |
| IR Inten    | -- | 0.0000   |       |       | 42.1472  |       |       | 42.1472  |       |       |
| Atom AN     | X  | Y        | Z     | X     | Y        | Z     | X     | Y        | Z     |       |
| 1           | 15 | 0.00     | 0.00  | 0.00  | 0.10     | -0.07 | 0.00  | 0.07     | 0.10  | 0.00  |
| 2           | 6  | 0.07     | 0.00  | 0.00  | -0.06    | 0.02  | 0.04  | -0.04    | -0.03 | -0.05 |
| 3           | 6  | 0.01     | 0.00  | 0.00  | -0.02    | 0.03  | 0.00  | -0.01    | -0.04 | 0.00  |
| 4           | 1  | -0.12    | 0.06  | -0.24 | 0.13     | -0.06 | 0.28  | 0.09     | -0.16 | 0.11  |
| 5           | 1  | -0.12    | -0.06 | 0.24  | 0.13     | 0.17  | -0.20 | 0.09     | 0.00  | -0.22 |
| 6           | 1  | -0.10    | 0.00  | 0.00  | 0.11     | 0.06  | -0.04 | 0.08     | -0.08 | 0.05  |
| 7           | 1  | -0.08    | 0.15  | -0.11 | 0.09     | -0.17 | 0.11  | 0.06     | -0.13 | 0.10  |
| 8           | 1  | -0.08    | -0.15 | 0.11  | 0.09     | 0.18  | -0.13 | 0.06     | 0.12  | -0.07 |
| 9           | 6  | 0.00     | 0.07  | 0.00  | -0.03    | 0.04  | 0.05  | -0.02    | -0.06 | 0.04  |
| 10          | 6  | 0.00     | 0.01  | 0.00  | -0.04    | 0.01  | 0.00  | -0.03    | -0.02 | 0.00  |
| 11          | 1  | 0.06     | -0.12 | 0.24  | 0.00     | -0.09 | 0.22  | -0.17    | 0.13  | -0.20 |
| 12          | 1  | -0.06    | -0.12 | -0.24 | -0.16    | -0.09 | -0.11 | 0.06     | 0.13  | 0.28  |
| 13          | 1  | 0.00     | -0.10 | 0.00  | -0.08    | -0.08 | -0.05 | -0.06    | 0.11  | -0.04 |
| 14          | 1  | 0.15     | -0.08 | 0.11  | 0.12     | -0.06 | 0.07  | -0.18    | 0.09  | -0.13 |
| 15          | 1  | -0.15    | -0.08 | -0.11 | -0.13    | -0.06 | -0.10 | 0.17     | 0.09  | 0.11  |
| 16          | 6  | -0.07    | 0.00  | 0.00  | -0.06    | 0.02  | -0.04 | -0.04    | -0.03 | 0.05  |
| 17          | 6  | -0.01    | 0.00  | 0.00  | -0.02    | 0.03  | 0.00  | -0.01    | -0.04 | 0.00  |
| 18          | 1  | 0.12     | -0.06 | -0.24 | 0.13     | -0.06 | -0.28 | 0.09     | -0.16 | -0.11 |
| 19          | 1  | 0.12     | 0.06  | 0.24  | 0.13     | 0.17  | 0.20  | 0.09     | 0.00  | 0.22  |
| 20          | 1  | 0.10     | 0.00  | 0.00  | 0.11     | 0.06  | 0.04  | 0.08     | -0.08 | -0.05 |
| 21          | 1  | 0.08     | -0.15 | -0.11 | 0.09     | -0.17 | -0.11 | 0.06     | -0.13 | -0.10 |
| 22          | 1  | 0.08     | 0.15  | 0.11  | 0.09     | 0.18  | 0.13  | 0.06     | 0.12  | 0.07  |
| 23          | 6  | 0.00     | -0.07 | 0.00  | -0.03    | 0.04  | -0.05 | -0.02    | -0.06 | -0.04 |
| 24          | 6  | 0.00     | -0.01 | 0.00  | -0.04    | 0.01  | 0.00  | -0.03    | -0.02 | 0.00  |
| 25          | 1  | -0.06    | 0.12  | 0.24  | 0.00     | -0.09 | -0.22 | -0.17    | 0.13  | 0.20  |
| 26          | 1  | 0.06     | 0.12  | -0.24 | -0.16    | -0.09 | 0.11  | 0.06     | 0.13  | -0.28 |
| 27          | 1  | 0.00     | 0.10  | 0.00  | -0.08    | -0.08 | 0.05  | -0.06    | 0.11  | 0.04  |
| 28          | 1  | -0.15    | 0.08  | 0.11  | 0.12     | -0.06 | -0.07 | -0.18    | 0.09  | 0.13  |
| 29          | 1  | 0.15     | 0.08  | -0.11 | -0.13    | -0.06 | 0.10  | 0.17     | 0.09  | -0.11 |

| 25          |          |       |       | 26       |       |       | 27       |       |       |
|-------------|----------|-------|-------|----------|-------|-------|----------|-------|-------|
| B2          |          |       |       | A2       |       |       | E        |       |       |
| Frequencies | 802.5151 |       |       | 981.5785 |       |       | 992.9760 |       |       |
| Red. masses | 3.3757   |       |       | 1.1275   |       |       | 1.2744   |       |       |
| Frc consts  | 1.2809   |       |       | 0.6401   |       |       | 0.7404   |       |       |
| IR Inten    | 32.0408  |       |       | 0.0000   |       |       | 0.8588   |       |       |
| Atom AN     | X        | Y     | Z     | X        | Y     | Z     | X        | Y     | Z     |
| 1 15        | 0.00     | 0.00  | 0.21  | 0.00     | 0.00  | 0.00  | -0.02    | -0.01 | 0.00  |
| 2 6         | 0.00     | -0.07 | -0.13 | -0.03    | 0.00  | 0.00  | 0.01     | 0.02  | 0.00  |
| 3 6         | 0.00     | -0.05 | -0.02 | 0.04     | 0.00  | 0.00  | -0.01    | -0.03 | -0.01 |
| 4 1         | 0.01     | 0.00  | -0.10 | 0.01     | 0.25  | 0.08  | -0.01    | 0.06  | -0.02 |
| 5 1         | -0.01    | 0.00  | -0.10 | 0.01     | -0.25 | -0.08 | 0.00     | 0.18  | 0.04  |
| 6 1         | 0.00     | -0.28 | 0.26  | -0.12    | 0.00  | 0.00  | 0.03     | -0.12 | 0.10  |
| 7 1         | 0.02     | 0.14  | 0.04  | -0.07    | 0.17  | -0.12 | 0.03     | 0.01  | 0.06  |
| 8 1         | -0.02    | 0.14  | 0.04  | -0.07    | -0.17 | 0.12  | 0.01     | 0.11  | -0.01 |
| 9 6         | 0.07     | 0.00  | -0.13 | 0.00     | 0.03  | 0.00  | 0.05     | 0.00  | -0.01 |
| 10 6        | 0.05     | 0.00  | -0.02 | 0.00     | -0.04 | 0.00  | -0.08    | 0.00  | 0.02  |
| 11 1        | 0.00     | -0.01 | -0.10 | -0.25    | -0.01 | 0.08  | 0.28     | -0.01 | -0.01 |
| 12 1        | 0.00     | 0.01  | -0.10 | 0.25     | -0.01 | -0.08 | 0.33     | 0.00  | -0.04 |
| 13 1        | 0.28     | 0.00  | 0.26  | 0.00     | 0.12  | 0.00  | -0.30    | 0.01  | -0.26 |
| 14 1        | -0.14    | -0.02 | 0.04  | -0.17    | 0.07  | -0.12 | 0.13     | 0.04  | -0.08 |
| 15 1        | -0.14    | 0.02  | 0.04  | 0.17     | 0.07  | 0.12  | 0.17     | -0.02 | -0.06 |
| 16 6        | 0.00     | 0.07  | -0.13 | 0.03     | 0.00  | 0.00  | 0.01     | 0.02  | 0.00  |
| 17 6        | 0.00     | 0.05  | -0.02 | -0.04    | 0.00  | 0.00  | -0.01    | -0.03 | 0.01  |
| 18 1        | -0.01    | 0.00  | -0.10 | -0.01    | -0.25 | 0.08  | -0.01    | 0.06  | 0.02  |
| 19 1        | 0.01     | 0.00  | -0.10 | -0.01    | 0.25  | -0.08 | 0.00     | 0.18  | -0.04 |
| 20 1        | 0.00     | 0.28  | 0.26  | 0.12     | 0.00  | 0.00  | 0.03     | -0.12 | -0.10 |
| 21 1        | -0.02    | -0.14 | 0.04  | 0.07     | -0.17 | -0.12 | 0.03     | 0.01  | -0.06 |
| 22 1        | 0.02     | -0.14 | 0.04  | 0.07     | 0.17  | 0.12  | 0.01     | 0.11  | 0.01  |
| 23 6        | -0.07    | 0.00  | -0.13 | 0.00     | -0.03 | 0.00  | 0.05     | 0.00  | 0.01  |
| 24 6        | -0.05    | 0.00  | -0.02 | 0.00     | 0.04  | 0.00  | -0.08    | 0.00  | -0.02 |
| 25 1        | 0.00     | 0.01  | -0.10 | 0.25     | 0.01  | 0.08  | 0.28     | -0.01 | 0.01  |
| 26 1        | 0.00     | -0.01 | -0.10 | -0.25    | 0.01  | -0.08 | 0.33     | 0.00  | 0.04  |
| 27 1        | -0.28    | 0.00  | 0.26  | 0.00     | -0.12 | 0.00  | -0.30    | 0.01  | 0.26  |
| 28 1        | 0.14     | 0.02  | 0.04  | 0.17     | -0.07 | -0.12 | 0.13     | 0.04  | 0.08  |
| 29 1        | 0.14     | -0.02 | 0.04  | -0.17    | -0.07 | 0.12  | 0.17     | -0.02 | 0.06  |

| 28          |    |          |       | 29    |           |       | 30    |           |       |       |
|-------------|----|----------|-------|-------|-----------|-------|-------|-----------|-------|-------|
| E           |    |          |       | A1    |           |       | B2    |           |       |       |
| Frequencies | -- | 992.9760 |       |       | 1001.0455 |       |       | 1018.6371 |       |       |
| Red. masses | -- | 1.2744   |       |       | 1.6102    |       |       | 1.9070    |       |       |
| Frc consts  | -- | 0.7404   |       |       | 0.9507    |       |       | 1.1659    |       |       |
| IR Inten    | -- | 0.8588   |       |       | 0.0000    |       |       | 0.0032    |       |       |
| Atom AN     | X  | Y        | Z     | X     | Y         | Z     | X     | Y         | Z     |       |
| 1           | 15 | -0.01    | 0.02  | 0.00  | 0.00      | 0.00  | 0.00  | 0.00      | 0.07  |       |
| 2           | 6  | 0.00     | -0.05 | -0.01 | 0.00      | -0.07 | 0.01  | 0.00      | -0.09 | 0.00  |
| 3           | 6  | 0.00     | 0.08  | 0.02  | 0.00      | 0.09  | -0.01 | 0.00      | 0.10  | -0.02 |
| 4           | 1  | 0.00     | -0.33 | -0.04 | 0.01      | -0.24 | 0.00  | 0.01      | -0.27 | 0.00  |
| 5           | 1  | -0.01    | -0.28 | -0.01 | -0.01     | -0.24 | 0.00  | -0.01     | -0.27 | 0.00  |
| 6           | 1  | 0.01     | 0.30  | -0.26 | 0.00      | 0.24  | -0.20 | 0.00      | 0.21  | -0.16 |
| 7           | 1  | -0.02    | -0.17 | -0.06 | -0.02     | -0.07 | -0.07 | -0.02     | -0.05 | -0.07 |
| 8           | 1  | 0.04     | -0.13 | -0.08 | 0.02      | -0.07 | -0.07 | 0.02      | -0.05 | -0.07 |
| 9           | 6  | 0.02     | -0.01 | 0.00  | -0.07     | 0.00  | -0.01 | 0.09      | 0.00  | 0.00  |
| 10          | 6  | -0.03    | 0.01  | 0.01  | 0.09      | 0.00  | 0.01  | -0.10     | 0.00  | -0.02 |
| 11          | 1  | 0.18     | 0.00  | -0.04 | -0.24     | 0.01  | 0.00  | 0.27      | -0.01 | 0.00  |
| 12          | 1  | 0.06     | 0.01  | 0.02  | -0.24     | -0.01 | 0.00  | 0.27      | 0.01  | 0.00  |
| 13          | 1  | -0.12    | -0.03 | -0.10 | 0.24      | 0.00  | 0.20  | -0.21     | 0.00  | -0.16 |
| 14          | 1  | 0.11     | -0.01 | 0.01  | -0.07     | -0.02 | 0.07  | 0.05      | 0.02  | -0.07 |
| 15          | 1  | 0.01     | -0.03 | -0.06 | -0.07     | 0.02  | 0.07  | 0.05      | -0.02 | -0.07 |
| 16          | 6  | 0.00     | -0.05 | 0.01  | 0.00      | 0.07  | 0.01  | 0.00      | 0.09  | 0.00  |
| 17          | 6  | 0.00     | 0.08  | -0.02 | 0.00      | -0.09 | -0.01 | 0.00      | -0.10 | -0.02 |
| 18          | 1  | 0.00     | -0.33 | 0.04  | -0.01     | 0.24  | 0.00  | -0.01     | 0.27  | 0.00  |
| 19          | 1  | -0.01    | -0.28 | 0.01  | 0.01      | 0.24  | 0.00  | 0.01      | 0.27  | 0.00  |
| 20          | 1  | 0.01     | 0.30  | 0.26  | 0.00      | -0.24 | -0.20 | 0.00      | -0.21 | -0.16 |
| 21          | 1  | -0.02    | -0.17 | 0.06  | 0.02      | 0.07  | -0.07 | 0.02      | 0.05  | -0.07 |
| 22          | 1  | 0.04     | -0.13 | 0.08  | -0.02     | 0.07  | -0.07 | -0.02     | 0.05  | -0.07 |
| 23          | 6  | 0.02     | -0.01 | 0.00  | 0.07      | 0.00  | -0.01 | -0.09     | 0.00  | 0.00  |
| 24          | 6  | -0.03    | 0.01  | -0.01 | -0.09     | 0.00  | 0.01  | 0.10      | 0.00  | -0.02 |
| 25          | 1  | 0.18     | 0.00  | 0.04  | 0.24      | -0.01 | 0.00  | -0.27     | 0.01  | 0.00  |
| 26          | 1  | 0.06     | 0.01  | -0.02 | 0.24      | 0.01  | 0.00  | -0.27     | -0.01 | 0.00  |
| 27          | 1  | -0.12    | -0.03 | 0.10  | -0.24     | 0.00  | 0.20  | 0.21      | 0.00  | -0.16 |
| 28          | 1  | 0.11     | -0.01 | -0.01 | 0.07      | 0.02  | 0.07  | -0.05     | -0.02 | -0.07 |
| 29          | 1  | 0.01     | -0.03 | 0.06  | 0.07      | -0.02 | 0.07  | -0.05     | 0.02  | -0.07 |

|                |    | 31        |       |       | 32        |       |       | 33        |       |       |
|----------------|----|-----------|-------|-------|-----------|-------|-------|-----------|-------|-------|
|                |    | E         |       |       | E         |       |       | B1        |       |       |
| Frequencies -- |    | 1024.1402 |       |       | 1024.1402 |       |       | 1053.1360 |       |       |
| Red. masses -- |    | 1.9351    |       |       | 1.9351    |       |       | 1.2749    |       |       |
| Frc consts --  |    | 1.1958    |       |       | 1.1958    |       |       | 0.8331    |       |       |
| IR Inten --    |    | 1.1967    |       |       | 1.1967    |       |       | 0.0000    |       |       |
| Atom AN        |    | X         | Y     | Z     | X         | Y     | Z     | X         | Y     | Z     |
| 1              | 15 | 0.02      | 0.01  | 0.00  | -0.01     | 0.02  | 0.00  | 0.00      | 0.00  | 0.00  |
| 2              | 6  | -0.05     | 0.08  | -0.04 | 0.04      | 0.09  | -0.05 | 0.07      | 0.00  | 0.00  |
| 3              | 6  | 0.04      | -0.06 | 0.06  | -0.03     | -0.07 | 0.07  | -0.04     | 0.00  | 0.00  |
| 4              | 1  | 0.02      | 0.25  | 0.06  | -0.02     | -0.14 | -0.16 | -0.02     | -0.23 | -0.14 |
| 5              | 1  | 0.02      | -0.17 | -0.16 | -0.02     | 0.23  | 0.04  | -0.02     | 0.23  | 0.14  |
| 6              | 1  | -0.11     | 0.01  | -0.03 | 0.09      | 0.01  | -0.03 | 0.11      | 0.00  | 0.00  |
| 7              | 1  | -0.06     | 0.02  | -0.07 | 0.04      | -0.28 | 0.14  | 0.06      | -0.15 | 0.11  |
| 8              | 1  | -0.05     | -0.28 | 0.14  | 0.06      | -0.01 | -0.05 | 0.06      | 0.15  | -0.11 |
| 9              | 6  | 0.09      | -0.04 | 0.05  | -0.08     | -0.05 | -0.04 | 0.00      | 0.07  | 0.00  |
| 10             | 6  | -0.07     | 0.03  | -0.07 | 0.06      | 0.04  | 0.06  | 0.00      | -0.04 | 0.00  |
| 11             | 1  | 0.23      | 0.02  | -0.04 | 0.17      | 0.02  | -0.16 | -0.23     | -0.02 | 0.14  |
| 12             | 1  | -0.14     | 0.02  | 0.16  | -0.25     | 0.02  | 0.06  | 0.23      | -0.02 | -0.14 |
| 13             | 1  | 0.01      | -0.09 | 0.03  | -0.01     | -0.11 | -0.03 | 0.00      | 0.11  | 0.00  |
| 14             | 1  | -0.01     | -0.06 | 0.05  | 0.28      | -0.05 | 0.14  | -0.15     | 0.06  | -0.11 |
| 15             | 1  | -0.28     | -0.04 | -0.14 | -0.02     | -0.06 | -0.07 | 0.15      | 0.06  | 0.11  |
| 16             | 6  | -0.05     | 0.08  | 0.04  | 0.04      | 0.09  | 0.05  | -0.07     | 0.00  | 0.00  |
| 17             | 6  | 0.04      | -0.06 | -0.06 | -0.03     | -0.07 | -0.07 | 0.04      | 0.00  | 0.00  |
| 18             | 1  | 0.02      | 0.25  | -0.06 | -0.02     | -0.14 | 0.16  | 0.02      | 0.23  | -0.14 |
| 19             | 1  | 0.02      | -0.17 | 0.16  | -0.02     | 0.23  | -0.04 | 0.02      | -0.23 | 0.14  |
| 20             | 1  | -0.11     | 0.01  | 0.03  | 0.09      | 0.01  | 0.03  | -0.11     | 0.00  | 0.00  |
| 21             | 1  | -0.06     | 0.02  | 0.07  | 0.04      | -0.28 | -0.14 | -0.06     | 0.15  | 0.11  |
| 22             | 1  | -0.05     | -0.28 | -0.14 | 0.06      | -0.01 | 0.05  | -0.06     | -0.15 | -0.11 |
| 23             | 6  | 0.09      | -0.04 | -0.05 | -0.08     | -0.05 | 0.04  | 0.00      | -0.07 | 0.00  |
| 24             | 6  | -0.07     | 0.03  | 0.07  | 0.06      | 0.04  | -0.06 | 0.00      | 0.04  | 0.00  |
| 25             | 1  | 0.23      | 0.02  | 0.04  | 0.17      | 0.02  | 0.16  | 0.23      | 0.02  | 0.14  |
| 26             | 1  | -0.14     | 0.02  | -0.16 | -0.25     | 0.02  | -0.06 | -0.23     | 0.02  | -0.14 |
| 27             | 1  | 0.01      | -0.09 | -0.03 | -0.01     | -0.11 | 0.03  | 0.00      | -0.11 | 0.00  |
| 28             | 1  | -0.01     | -0.06 | -0.05 | 0.28      | -0.05 | -0.14 | 0.15      | -0.06 | -0.11 |
| 29             | 1  | -0.28     | -0.04 | 0.14  | -0.02     | -0.06 | 0.07  | -0.15     | -0.06 | 0.11  |

| 34          |    |           |       | 35    |           |       | 36    |           |       |       |
|-------------|----|-----------|-------|-------|-----------|-------|-------|-----------|-------|-------|
| E           |    |           |       | E     |           |       | B2    |           |       |       |
| Frequencies | -- | 1067.3162 |       |       | 1067.3163 |       |       | 1081.4178 |       |       |
| Red. masses | -- | 1.7542    |       |       | 1.7542    |       |       | 2.1440    |       |       |
| Frc consts  | -- | 1.1774    |       |       | 1.1774    |       |       | 1.4773    |       |       |
| IR Inten    | -- | 48.2183   |       |       | 48.2183   |       |       | 0.7218    |       |       |
| Atom AN     |    | X         | Y     | Z     | X         | Y     | Z     | X         | Y     | Z     |
| 1           | 15 | 0.05      | 0.02  | 0.00  | -0.02     | 0.05  | 0.00  | 0.00      | 0.00  | 0.04  |
| 2           | 6  | -0.07     | -0.03 | 0.03  | 0.03      | -0.07 | 0.08  | 0.00      | 0.08  | -0.09 |
| 3           | 6  | 0.05      | 0.01  | -0.04 | -0.02     | 0.03  | -0.09 | 0.00      | -0.03 | 0.09  |
| 4           | 1  | 0.02      | 0.20  | 0.17  | -0.03     | -0.11 | 0.00  | 0.01      | -0.06 | -0.10 |
| 5           | 1  | 0.04      | -0.22 | -0.13 | 0.00      | 0.06  | 0.12  | -0.01     | -0.06 | -0.10 |
| 6           | 1  | -0.12     | -0.06 | 0.06  | 0.05      | -0.16 | 0.14  | 0.00      | 0.18  | -0.15 |
| 7           | 1  | -0.05     | 0.26  | -0.13 | 0.06      | 0.16  | 0.04  | -0.03     | -0.27 | 0.01  |
| 8           | 1  | -0.08     | -0.08 | 0.12  | -0.01     | 0.29  | -0.06 | 0.03      | -0.27 | 0.01  |
| 9           | 6  | -0.07     | -0.03 | -0.08 | 0.03      | -0.07 | 0.03  | -0.08     | 0.00  | -0.09 |
| 10          | 6  | 0.03      | 0.02  | 0.09  | -0.01     | 0.05  | -0.04 | 0.03      | 0.00  | 0.09  |
| 11          | 1  | 0.06      | 0.00  | -0.12 | 0.22      | 0.04  | -0.13 | 0.06      | -0.01 | -0.10 |
| 12          | 1  | -0.11     | 0.03  | 0.00  | -0.20     | 0.02  | 0.17  | 0.06      | 0.01  | -0.10 |
| 13          | 1  | -0.16     | -0.05 | -0.14 | 0.06      | -0.12 | 0.06  | -0.18     | 0.00  | -0.15 |
| 14          | 1  | 0.29      | 0.01  | 0.06  | 0.08      | -0.08 | 0.12  | 0.27      | 0.03  | 0.01  |
| 15          | 1  | 0.16      | -0.06 | -0.04 | -0.26     | -0.05 | -0.13 | 0.27      | -0.03 | 0.01  |
| 16          | 6  | -0.07     | -0.03 | -0.03 | 0.03      | -0.07 | -0.08 | 0.00      | -0.08 | -0.09 |
| 17          | 6  | 0.05      | 0.01  | 0.04  | -0.02     | 0.03  | 0.09  | 0.00      | 0.03  | 0.09  |
| 18          | 1  | 0.02      | 0.20  | -0.17 | -0.03     | -0.11 | 0.00  | -0.01     | 0.06  | -0.10 |
| 19          | 1  | 0.04      | -0.22 | 0.13  | 0.00      | 0.06  | -0.12 | 0.01      | 0.06  | -0.10 |
| 20          | 1  | -0.12     | -0.06 | -0.06 | 0.05      | -0.16 | -0.14 | 0.00      | -0.18 | -0.15 |
| 21          | 1  | -0.05     | 0.26  | 0.13  | 0.06      | 0.16  | -0.04 | 0.03      | 0.27  | 0.01  |
| 22          | 1  | -0.08     | -0.08 | -0.12 | -0.01     | 0.29  | 0.06  | -0.03     | 0.27  | 0.01  |
| 23          | 6  | -0.07     | -0.03 | 0.08  | 0.03      | -0.07 | -0.03 | 0.08      | 0.00  | -0.09 |
| 24          | 6  | 0.03      | 0.02  | -0.09 | -0.01     | 0.05  | 0.04  | -0.03     | 0.00  | 0.09  |
| 25          | 1  | 0.06      | 0.00  | 0.12  | 0.22      | 0.04  | 0.13  | -0.06     | 0.01  | -0.10 |
| 26          | 1  | -0.11     | 0.03  | 0.00  | -0.20     | 0.02  | -0.17 | -0.06     | -0.01 | -0.10 |
| 27          | 1  | -0.16     | -0.05 | 0.14  | 0.06      | -0.12 | -0.06 | 0.18      | 0.00  | -0.15 |
| 28          | 1  | 0.29      | 0.01  | -0.06 | 0.08      | -0.08 | -0.12 | -0.27     | -0.03 | 0.01  |
| 29          | 1  | 0.16      | -0.06 | 0.04  | -0.26     | -0.05 | 0.13  | -0.27     | 0.03  | 0.01  |

| 37          |    |           |       | 38    |           |       | 39    |           |       |       |
|-------------|----|-----------|-------|-------|-----------|-------|-------|-----------|-------|-------|
| A1          |    |           |       | A2    |           |       | B1    |           |       |       |
| Frequencies | -- | 1088.8074 |       |       | 1261.4805 |       |       | 1269.7112 |       |       |
| Red. masses | -- | 2.1899    |       |       | 1.2370    |       |       | 1.1892    |       |       |
| Frc consts  | -- | 1.5296    |       |       | 1.1598    |       |       | 1.1296    |       |       |
| IR Inten    | -- | 0.0000    |       |       | 0.0000    |       |       | 0.0000    |       |       |
| Atom AN     |    | X         | Y     | Z     | X         | Y     | Z     | X         | Y     | Z     |
| 1           | 15 | 0.00      | 0.00  | 0.00  | 0.00      | 0.00  | 0.00  | 0.00      | 0.00  | 0.00  |
| 2           | 6  | 0.00      | -0.08 | 0.10  | 0.04      | 0.00  | 0.00  | -0.03     | 0.00  | 0.00  |
| 3           | 6  | 0.00      | 0.03  | -0.10 | -0.06     | 0.00  | 0.00  | 0.06      | 0.00  | 0.00  |
| 4           | 1  | -0.02     | 0.02  | 0.09  | -0.02     | 0.29  | -0.06 | 0.02      | -0.30 | 0.04  |
| 5           | 1  | 0.02      | 0.02  | 0.09  | -0.02     | -0.29 | 0.06  | 0.02      | 0.30  | -0.04 |
| 6           | 1  | 0.00      | -0.18 | 0.16  | 0.11      | 0.00  | 0.00  | -0.11     | 0.00  | 0.00  |
| 7           | 1  | 0.04      | 0.27  | -0.01 | 0.04      | -0.12 | 0.12  | -0.04     | 0.11  | -0.11 |
| 8           | 1  | -0.04     | 0.27  | -0.01 | 0.04      | 0.12  | -0.12 | -0.04     | -0.11 | 0.11  |
| 9           | 6  | -0.08     | 0.00  | -0.10 | 0.00      | -0.04 | 0.00  | 0.00      | -0.03 | 0.00  |
| 10          | 6  | 0.03      | 0.00  | 0.10  | 0.00      | 0.06  | 0.00  | 0.00      | 0.06  | 0.00  |
| 11          | 1  | 0.02      | -0.02 | -0.09 | -0.29     | 0.02  | -0.06 | -0.30     | 0.02  | -0.04 |
| 12          | 1  | 0.02      | 0.02  | -0.09 | 0.29      | 0.02  | 0.06  | 0.30      | 0.02  | 0.04  |
| 13          | 1  | -0.18     | 0.00  | -0.16 | 0.00      | -0.11 | 0.00  | 0.00      | -0.11 | 0.00  |
| 14          | 1  | 0.27      | 0.04  | 0.01  | 0.12      | -0.04 | 0.12  | 0.11      | -0.04 | 0.11  |
| 15          | 1  | 0.27      | -0.04 | 0.01  | -0.12     | -0.04 | -0.12 | -0.11     | -0.04 | -0.11 |
| 16          | 6  | 0.00      | 0.08  | 0.10  | -0.04     | 0.00  | 0.00  | 0.03      | 0.00  | 0.00  |
| 17          | 6  | 0.00      | -0.03 | -0.10 | 0.06      | 0.00  | 0.00  | -0.06     | 0.00  | 0.00  |
| 18          | 1  | 0.02      | -0.02 | 0.09  | 0.02      | -0.29 | -0.06 | -0.02     | 0.30  | 0.04  |
| 19          | 1  | -0.02     | -0.02 | 0.09  | 0.02      | 0.29  | 0.06  | -0.02     | -0.30 | -0.04 |
| 20          | 1  | 0.00      | 0.18  | 0.16  | -0.11     | 0.00  | 0.00  | 0.11      | 0.00  | 0.00  |
| 21          | 1  | -0.04     | -0.27 | -0.01 | -0.04     | 0.12  | 0.12  | 0.04      | -0.11 | -0.11 |
| 22          | 1  | 0.04      | -0.27 | -0.01 | -0.04     | -0.12 | -0.12 | 0.04      | 0.11  | 0.11  |
| 23          | 6  | 0.08      | 0.00  | -0.10 | 0.00      | 0.04  | 0.00  | 0.00      | 0.03  | 0.00  |
| 24          | 6  | -0.03     | 0.00  | 0.10  | 0.00      | -0.06 | 0.00  | 0.00      | -0.06 | 0.00  |
| 25          | 1  | -0.02     | 0.02  | -0.09 | 0.29      | -0.02 | -0.06 | 0.30      | -0.02 | -0.04 |
| 26          | 1  | -0.02     | -0.02 | -0.09 | -0.29     | -0.02 | 0.06  | -0.30     | -0.02 | 0.04  |
| 27          | 1  | 0.18      | 0.00  | -0.16 | 0.00      | 0.11  | 0.00  | 0.00      | 0.11  | 0.00  |
| 28          | 1  | -0.27     | -0.04 | 0.01  | -0.12     | 0.04  | 0.12  | -0.11     | 0.04  | 0.11  |
| 29          | 1  | -0.27     | 0.04  | 0.01  | 0.12      | 0.04  | -0.12 | 0.11      | 0.04  | -0.11 |



|             | 40 |           |       | 41    |           |       | 42    |           |       |       |
|-------------|----|-----------|-------|-------|-----------|-------|-------|-----------|-------|-------|
|             | E  |           |       | E     |           |       | B2    |           |       |       |
| Frequencies | -- | 1272.7467 |       |       | 1272.7467 |       |       | 1292.7210 |       |       |
| Red. masses | -- | 1.2894    |       |       | 1.2894    |       |       | 1.4677    |       |       |
| Frc consts  | -- | 1.2306    |       |       | 1.2306    |       |       | 1.4451    |       |       |
| IR Inten    | -- | 0.7074    |       |       | 0.7074    |       |       | 1.0010    |       |       |
| Atom AN     | X  | Y         | Z     | X     | Y         | Z     | X     | Y         | Z     |       |
| 1           | 15 | 0.00      | 0.00  | 0.00  | 0.00      | 0.00  | 0.00  | 0.00      | 0.00  |       |
| 2           | 6  | -0.03     | 0.05  | 0.02  | -0.03     | -0.04 | -0.01 | 0.00      | 0.09  | 0.02  |
| 3           | 6  | 0.05      | -0.02 | -0.02 | 0.05      | 0.01  | 0.02  | 0.00      | -0.02 | -0.03 |
| 4           | 1  | 0.01      | -0.40 | 0.02  | 0.03      | -0.13 | 0.07  | -0.02     | -0.31 | -0.04 |
| 5           | 1  | 0.03      | 0.06  | -0.06 | 0.01      | 0.41  | -0.03 | 0.02      | -0.31 | -0.04 |
| 6           | 1  | -0.09     | -0.06 | 0.04  | -0.10     | 0.05  | -0.03 | 0.00      | -0.13 | 0.09  |
| 7           | 1  | 0.00      | 0.14  | -0.06 | -0.06     | 0.06  | -0.13 | 0.05      | 0.06  | 0.05  |
| 8           | 1  | -0.06     | -0.04 | 0.12  | -0.01     | -0.15 | 0.09  | -0.05     | 0.06  | 0.05  |
| 9           | 6  | -0.04     | 0.03  | 0.01  | -0.05     | -0.03 | 0.02  | -0.09     | 0.00  | 0.02  |
| 10          | 6  | 0.01      | -0.05 | -0.02 | 0.02      | 0.05  | -0.02 | 0.02      | 0.00  | -0.03 |
| 11          | 1  | 0.41      | -0.01 | 0.03  | -0.06     | 0.03  | -0.06 | 0.31      | 0.02  | -0.04 |
| 12          | 1  | -0.13     | -0.03 | -0.07 | 0.40      | 0.01  | 0.02  | 0.31      | -0.02 | -0.04 |
| 13          | 1  | 0.05      | 0.10  | 0.03  | 0.06      | -0.09 | 0.04  | 0.13      | 0.00  | 0.09  |
| 14          | 1  | -0.15     | 0.01  | -0.09 | 0.04      | -0.06 | 0.12  | -0.06     | -0.05 | 0.05  |
| 15          | 1  | 0.06      | 0.06  | 0.13  | -0.14     | 0.00  | -0.06 | -0.06     | 0.05  | 0.05  |
| 16          | 6  | -0.03     | 0.05  | -0.02 | -0.03     | -0.04 | 0.01  | 0.00      | -0.09 | 0.02  |
| 17          | 6  | 0.05      | -0.02 | 0.02  | 0.05      | 0.01  | -0.02 | 0.00      | 0.02  | -0.03 |
| 18          | 1  | 0.01      | -0.40 | -0.02 | 0.03      | -0.13 | -0.07 | 0.02      | 0.31  | -0.04 |
| 19          | 1  | 0.03      | 0.06  | 0.06  | 0.01      | 0.41  | 0.03  | -0.02     | 0.31  | -0.04 |
| 20          | 1  | -0.09     | -0.06 | -0.04 | -0.10     | 0.05  | 0.03  | 0.00      | 0.13  | 0.09  |
| 21          | 1  | 0.00      | 0.14  | 0.06  | -0.06     | 0.06  | 0.13  | -0.05     | -0.06 | 0.05  |
| 22          | 1  | -0.06     | -0.04 | -0.12 | -0.01     | -0.15 | -0.09 | 0.05      | -0.06 | 0.05  |
| 23          | 6  | -0.04     | 0.03  | -0.01 | -0.05     | -0.03 | -0.02 | 0.09      | 0.00  | 0.02  |
| 24          | 6  | 0.01      | -0.05 | 0.02  | 0.02      | 0.05  | 0.02  | -0.02     | 0.00  | -0.03 |
| 25          | 1  | 0.41      | -0.01 | -0.03 | -0.06     | 0.03  | 0.06  | -0.31     | -0.02 | -0.04 |
| 26          | 1  | -0.13     | -0.03 | 0.07  | 0.40      | 0.01  | -0.02 | -0.31     | 0.02  | -0.04 |
| 27          | 1  | 0.05      | 0.10  | -0.03 | 0.06      | -0.09 | -0.04 | -0.13     | 0.00  | 0.09  |
| 28          | 1  | -0.15     | 0.01  | 0.09  | 0.04      | -0.06 | -0.12 | 0.06      | 0.05  | 0.05  |
| 29          | 1  | 0.06      | 0.06  | -0.13 | -0.14     | 0.00  | 0.06  | 0.06      | -0.05 | 0.05  |

| 43          |    |           |       | 44    |           |       | 45    |           |       |       |
|-------------|----|-----------|-------|-------|-----------|-------|-------|-----------|-------|-------|
| E           |    |           |       | E     |           |       | A1    |           |       |       |
| Frequencies | -- | 1300.2604 |       |       | 1300.2605 |       |       | 1312.6808 |       |       |
| Red. masses | -- | 1.3892    |       |       | 1.3892    |       |       | 1.4415    |       |       |
| Frc consts  | -- | 1.3838    |       |       | 1.3838    |       |       | 1.4635    |       |       |
| IR Inten    | -- | 3.9610    |       |       | 3.9610    |       |       | 0.0000    |       |       |
| Atom AN     |    | X         | Y     | Z     | X         | Y     | Z     | X         | Y     | Z     |
| 1           | 15 | 0.01      | 0.03  | 0.00  | -0.03     | 0.01  | 0.00  | 0.00      | 0.00  | 0.00  |
| 2           | 6  | 0.01      | -0.10 | -0.02 | -0.01     | -0.04 | -0.01 | 0.00      | -0.09 | -0.01 |
| 3           | 6  | -0.02     | 0.03  | 0.03  | 0.04      | 0.01  | 0.01  | 0.00      | 0.03  | 0.03  |
| 4           | 1  | 0.00      | 0.44  | 0.02  | 0.01      | -0.11 | 0.02  | 0.01      | 0.32  | 0.04  |
| 5           | 1  | -0.01     | 0.21  | 0.03  | 0.01      | 0.40  | 0.01  | -0.01     | 0.32  | 0.04  |
| 6           | 1  | 0.03      | 0.11  | -0.07 | -0.07     | 0.05  | -0.03 | 0.00      | 0.09  | -0.05 |
| 7           | 1  | -0.03     | -0.11 | -0.01 | -0.04     | 0.03  | -0.09 | -0.04     | -0.07 | -0.05 |
| 8           | 1  | 0.05      | -0.05 | -0.08 | 0.00      | -0.10 | 0.05  | 0.04      | -0.07 | -0.05 |
| 9           | 6  | -0.04     | 0.01  | 0.01  | 0.10      | 0.01  | -0.02 | -0.09     | 0.00  | 0.01  |
| 10          | 6  | 0.01      | -0.04 | -0.01 | -0.03     | -0.02 | 0.03  | 0.03      | 0.00  | -0.03 |
| 11          | 1  | 0.40      | -0.01 | -0.01 | -0.21     | -0.01 | 0.03  | 0.32      | 0.01  | -0.04 |
| 12          | 1  | -0.11     | -0.01 | -0.02 | -0.44     | 0.00  | 0.02  | 0.32      | -0.01 | -0.04 |
| 13          | 1  | 0.05      | 0.07  | 0.03  | -0.11     | 0.03  | -0.07 | 0.09      | 0.00  | 0.05  |
| 14          | 1  | -0.10     | 0.00  | -0.05 | 0.05      | 0.05  | -0.08 | -0.07     | -0.04 | 0.05  |
| 15          | 1  | 0.03      | 0.04  | 0.09  | 0.11      | -0.03 | -0.01 | -0.07     | 0.04  | 0.05  |
| 16          | 6  | 0.01      | -0.10 | 0.02  | -0.01     | -0.04 | 0.01  | 0.00      | 0.09  | -0.01 |
| 17          | 6  | -0.02     | 0.03  | -0.03 | 0.04      | 0.01  | -0.01 | 0.00      | -0.03 | 0.03  |
| 18          | 1  | 0.00      | 0.44  | -0.02 | 0.01      | -0.11 | -0.02 | -0.01     | -0.32 | 0.04  |
| 19          | 1  | -0.01     | 0.21  | -0.03 | 0.01      | 0.40  | -0.01 | 0.01      | -0.32 | 0.04  |
| 20          | 1  | 0.03      | 0.11  | 0.07  | -0.07     | 0.05  | 0.03  | 0.00      | -0.09 | -0.05 |
| 21          | 1  | -0.03     | -0.11 | 0.01  | -0.04     | 0.03  | 0.09  | 0.04      | 0.07  | -0.05 |
| 22          | 1  | 0.05      | -0.05 | 0.08  | 0.00      | -0.10 | -0.05 | -0.04     | 0.07  | -0.05 |
| 23          | 6  | -0.04     | 0.01  | -0.01 | 0.10      | 0.01  | 0.02  | 0.09      | 0.00  | 0.01  |
| 24          | 6  | 0.01      | -0.04 | 0.01  | -0.03     | -0.02 | -0.03 | -0.03     | 0.00  | -0.03 |
| 25          | 1  | 0.40      | -0.01 | 0.01  | -0.21     | -0.01 | -0.03 | -0.32     | -0.01 | -0.04 |
| 26          | 1  | -0.11     | -0.01 | 0.02  | -0.44     | 0.00  | -0.02 | -0.32     | 0.01  | -0.04 |
| 27          | 1  | 0.05      | 0.07  | -0.03 | -0.11     | 0.03  | 0.07  | -0.09     | 0.00  | 0.05  |
| 28          | 1  | -0.10     | 0.00  | 0.05  | 0.05      | 0.05  | 0.08  | 0.07      | 0.04  | 0.05  |
| 29          | 1  | 0.03      | 0.04  | -0.09 | 0.11      | -0.03 | 0.01  | 0.07      | -0.04 | 0.05  |

| 46          |    |           |       | 47    |           |       | 48    |           |       |       |
|-------------|----|-----------|-------|-------|-----------|-------|-------|-----------|-------|-------|
| A1          |    |           |       | E     |           |       | E     |           |       |       |
| Frequencies | -- | 1424.3527 |       |       | 1424.7874 |       |       | 1424.7874 |       |       |
| Red. masses | -- | 1.1769    |       |       | 1.1954    |       |       | 1.1954    |       |       |
| Frc consts  | -- | 1.4068    |       |       | 1.4298    |       |       | 1.4298    |       |       |
| IR Inten    | -- | 0.0000    |       |       | 2.5831    |       |       | 2.5831    |       |       |
| Atom AN     |    | X         | Y     | Z     | X         | Y     | Z     | X         | Y     | Z     |
| 1           | 15 | 0.00      | 0.00  | 0.00  | 0.00      | 0.00  | 0.00  | 0.00      | 0.00  | 0.00  |
| 2           | 6  | 0.00      | 0.00  | 0.01  | 0.00      | 0.00  | 0.00  | 0.00      | 0.00  | 0.00  |
| 3           | 6  | 0.00      | -0.05 | 0.03  | 0.00      | 0.08  | -0.04 | 0.00      | 0.00  | 0.00  |
| 4           | 1  | -0.07     | 0.01  | -0.09 | 0.00      | 0.00  | 0.00  | 0.00      | 0.00  | 0.00  |
| 5           | 1  | 0.07      | 0.01  | -0.09 | 0.00      | 0.00  | 0.00  | 0.00      | 0.00  | 0.00  |
| 6           | 1  | 0.00      | 0.18  | -0.23 | 0.00      | -0.24 | 0.33  | 0.01      | 0.00  | 0.00  |
| 7           | 1  | -0.08     | 0.24  | -0.04 | 0.13      | -0.37 | 0.09  | 0.00      | 0.00  | 0.00  |
| 8           | 1  | 0.08      | 0.24  | -0.04 | -0.13     | -0.37 | 0.09  | 0.00      | 0.00  | 0.00  |
| 9           | 6  | 0.00      | 0.00  | -0.01 | 0.00      | 0.00  | 0.00  | 0.00      | 0.00  | 0.00  |
| 10          | 6  | -0.05     | 0.00  | -0.03 | 0.00      | 0.00  | 0.00  | 0.08      | 0.00  | 0.04  |
| 11          | 1  | 0.01      | -0.07 | 0.09  | 0.00      | 0.00  | 0.00  | 0.00      | 0.00  | 0.00  |
| 12          | 1  | 0.01      | 0.07  | 0.09  | 0.00      | 0.00  | 0.00  | 0.00      | 0.00  | 0.00  |
| 13          | 1  | 0.18      | 0.00  | 0.23  | 0.00      | 0.01  | 0.00  | -0.24     | 0.00  | -0.33 |
| 14          | 1  | 0.24      | -0.08 | 0.04  | 0.00      | 0.00  | 0.00  | -0.37     | 0.13  | -0.09 |
| 15          | 1  | 0.24      | 0.08  | 0.04  | 0.00      | 0.00  | 0.00  | -0.37     | -0.13 | -0.09 |
| 16          | 6  | 0.00      | 0.00  | 0.01  | 0.00      | 0.00  | 0.00  | 0.00      | 0.00  | 0.00  |
| 17          | 6  | 0.00      | 0.05  | 0.03  | 0.00      | 0.08  | 0.04  | 0.00      | 0.00  | 0.00  |
| 18          | 1  | 0.07      | -0.01 | -0.09 | 0.00      | 0.00  | 0.00  | 0.00      | 0.00  | 0.00  |
| 19          | 1  | -0.07     | -0.01 | -0.09 | 0.00      | 0.00  | 0.00  | 0.00      | 0.00  | 0.00  |
| 20          | 1  | 0.00      | -0.18 | -0.23 | 0.00      | -0.24 | -0.33 | 0.01      | 0.00  | 0.00  |
| 21          | 1  | 0.08      | -0.24 | -0.04 | 0.13      | -0.37 | -0.09 | 0.00      | 0.00  | 0.00  |
| 22          | 1  | -0.08     | -0.24 | -0.04 | -0.13     | -0.37 | -0.09 | 0.00      | 0.00  | 0.00  |
| 23          | 6  | 0.00      | 0.00  | -0.01 | 0.00      | 0.00  | 0.00  | 0.00      | 0.00  | 0.00  |
| 24          | 6  | 0.05      | 0.00  | -0.03 | 0.00      | 0.00  | 0.00  | 0.08      | 0.00  | -0.04 |
| 25          | 1  | -0.01     | 0.07  | 0.09  | 0.00      | 0.00  | 0.00  | 0.00      | 0.00  | 0.00  |
| 26          | 1  | -0.01     | -0.07 | 0.09  | 0.00      | 0.00  | 0.00  | 0.00      | 0.00  | 0.00  |
| 27          | 1  | -0.18     | 0.00  | 0.23  | 0.00      | 0.01  | 0.00  | -0.24     | 0.00  | 0.33  |
| 28          | 1  | -0.24     | 0.08  | 0.04  | 0.00      | 0.00  | 0.00  | -0.37     | 0.13  | 0.09  |
| 29          | 1  | -0.24     | -0.08 | 0.04  | 0.00      | 0.00  | 0.00  | -0.37     | -0.13 | 0.09  |

|             |    |  | 49        |       |       | 50        |       |       | 51        |       |       |
|-------------|----|--|-----------|-------|-------|-----------|-------|-------|-----------|-------|-------|
|             |    |  | B2        |       |       | E         |       |       | E         |       |       |
| Frequencies | -- |  | 1425.1696 |       |       | 1452.1269 |       |       | 1452.1269 |       |       |
| Red. masses | -- |  | 1.2079    |       |       | 1.0749    |       |       | 1.0749    |       |       |
| Frc consts  | -- |  | 1.4455    |       |       | 1.3354    |       |       | 1.3354    |       |       |
| IR Inten    | -- |  | 1.5017    |       |       | 0.0965    |       |       | 0.0965    |       |       |
| Atom AN     |    |  | X         | Y     | Z     | X         | Y     | Z     | X         | Y     | Z     |
| 1           | 15 |  | 0.00      | 0.00  | -0.01 | 0.00      | 0.00  | 0.00  | 0.00      | 0.00  | 0.00  |
| 2           | 6  |  | 0.00      | -0.01 | 0.01  | 0.00      | 0.00  | -0.02 | 0.00      | 0.01  | -0.05 |
| 3           | 6  |  | 0.00      | 0.06  | -0.03 | 0.00      | 0.00  | 0.00  | 0.00      | 0.00  | 0.00  |
| 4           | 1  |  | -0.05     | 0.04  | -0.05 | 0.13      | 0.00  | 0.17  | 0.28      | -0.05 | 0.34  |
| 5           | 1  |  | 0.05      | 0.04  | -0.05 | -0.13     | -0.04 | 0.17  | -0.28     | -0.03 | 0.34  |
| 6           | 1  |  | 0.00      | -0.16 | 0.22  | -0.07     | -0.01 | 0.01  | 0.03      | -0.02 | 0.01  |
| 7           | 1  |  | 0.10      | -0.26 | 0.07  | -0.01     | -0.04 | -0.02 | 0.00      | 0.03  | 0.00  |
| 8           | 1  |  | -0.10     | -0.26 | 0.07  | 0.00      | 0.05  | 0.01  | 0.01      | -0.02 | -0.02 |
| 9           | 6  |  | 0.01      | 0.00  | 0.01  | 0.01      | 0.00  | 0.05  | 0.00      | 0.00  | -0.02 |
| 10          | 6  |  | -0.06     | 0.00  | -0.03 | 0.00      | 0.00  | 0.00  | 0.00      | 0.00  | 0.00  |
| 11          | 1  |  | -0.04     | 0.05  | -0.05 | -0.03     | 0.28  | -0.34 | 0.04      | -0.13 | 0.17  |
| 12          | 1  |  | -0.04     | -0.05 | -0.05 | -0.05     | -0.28 | -0.34 | 0.00      | 0.13  | 0.17  |
| 13          | 1  |  | 0.16      | 0.00  | 0.22  | -0.02     | -0.03 | -0.01 | 0.01      | -0.07 | 0.01  |
| 14          | 1  |  | 0.26      | -0.10 | 0.07  | -0.02     | -0.01 | 0.02  | -0.05     | 0.00  | 0.01  |
| 15          | 1  |  | 0.26      | 0.10  | 0.07  | 0.03      | 0.00  | 0.00  | 0.04      | -0.01 | -0.02 |
| 16          | 6  |  | 0.00      | 0.01  | 0.01  | 0.00      | 0.00  | 0.02  | 0.00      | 0.01  | 0.05  |
| 17          | 6  |  | 0.00      | -0.06 | -0.03 | 0.00      | 0.00  | 0.00  | 0.00      | 0.00  | 0.00  |
| 18          | 1  |  | 0.05      | -0.04 | -0.05 | 0.13      | 0.00  | -0.17 | 0.28      | -0.05 | -0.34 |
| 19          | 1  |  | -0.05     | -0.04 | -0.05 | -0.13     | -0.04 | -0.17 | -0.28     | -0.03 | -0.34 |
| 20          | 1  |  | 0.00      | 0.16  | 0.22  | -0.07     | -0.01 | -0.01 | 0.03      | -0.02 | -0.01 |
| 21          | 1  |  | -0.10     | 0.26  | 0.07  | -0.01     | -0.04 | 0.02  | 0.00      | 0.03  | 0.00  |
| 22          | 1  |  | 0.10      | 0.26  | 0.07  | 0.00      | 0.05  | -0.01 | 0.01      | -0.02 | 0.02  |
| 23          | 6  |  | -0.01     | 0.00  | 0.01  | 0.01      | 0.00  | -0.05 | 0.00      | 0.00  | 0.02  |
| 24          | 6  |  | 0.06      | 0.00  | -0.03 | 0.00      | 0.00  | 0.00  | 0.00      | 0.00  | 0.00  |
| 25          | 1  |  | 0.04      | -0.05 | -0.05 | -0.03     | 0.28  | 0.34  | 0.04      | -0.13 | -0.17 |
| 26          | 1  |  | 0.04      | 0.05  | -0.05 | -0.05     | -0.28 | 0.34  | 0.00      | 0.13  | -0.17 |
| 27          | 1  |  | -0.16     | 0.00  | 0.22  | -0.02     | -0.03 | 0.01  | 0.01      | -0.07 | -0.01 |
| 28          | 1  |  | -0.26     | 0.10  | 0.07  | -0.02     | -0.01 | -0.02 | -0.05     | 0.00  | -0.01 |
| 29          | 1  |  | -0.26     | -0.10 | 0.07  | 0.03      | 0.00  | 0.00  | 0.04      | -0.01 | 0.02  |

| 52          |    |           |       | 53    |           |       | 54    |           |       |       |
|-------------|----|-----------|-------|-------|-----------|-------|-------|-----------|-------|-------|
| A1          |    |           |       | B2    |           |       | B2    |           |       |       |
| Frequencies | -- | 1463.8883 |       |       | 1465.9144 |       |       | 1509.6582 |       |       |
| Red. masses | -- | 1.0873    |       |       | 1.0833    |       |       | 1.0393    |       |       |
| Frc consts  | -- | 1.3728    |       |       | 1.3716    |       |       | 1.3956    |       |       |
| IR Inten    | -- | 0.0000    |       |       | 60.4743   |       |       | 4.1958    |       |       |
| Atom AN     |    | X         | Y     | Z     | X         | Y     | Z     | X         | Y     | Z     |
| 1           | 15 | 0.00      | 0.00  | 0.00  | 0.00      | 0.00  | -0.01 | 0.00      | 0.00  | 0.00  |
| 2           | 6  | 0.00      | -0.01 | 0.04  | 0.00      | 0.01  | -0.04 | 0.00      | 0.01  | 0.01  |
| 3           | 6  | 0.00      | 0.02  | -0.01 | 0.00      | 0.01  | -0.01 | 0.00      | 0.01  | 0.02  |
| 4           | 1  | -0.21     | 0.03  | -0.26 | 0.22      | -0.03 | 0.26  | 0.02      | -0.02 | 0.03  |
| 5           | 1  | 0.21      | 0.03  | -0.26 | -0.22     | -0.03 | 0.26  | -0.02     | -0.02 | 0.03  |
| 6           | 1  | 0.00      | -0.03 | 0.05  | 0.00      | -0.03 | 0.03  | 0.00      | -0.13 | 0.17  |
| 7           | 1  | 0.04      | -0.08 | 0.04  | 0.04      | -0.05 | 0.04  | -0.18     | -0.04 | -0.25 |
| 8           | 1  | -0.04     | -0.08 | 0.04  | -0.04     | -0.05 | 0.04  | 0.18      | -0.04 | -0.25 |
| 9           | 6  | -0.01     | 0.00  | -0.04 | -0.01     | 0.00  | -0.04 | -0.01     | 0.00  | 0.01  |
| 10          | 6  | 0.02      | 0.00  | 0.01  | -0.01     | 0.00  | -0.01 | -0.01     | 0.00  | 0.02  |
| 11          | 1  | 0.03      | -0.21 | 0.26  | 0.03      | -0.22 | 0.26  | 0.02      | -0.02 | 0.03  |
| 12          | 1  | 0.03      | 0.21  | 0.26  | 0.03      | 0.22  | 0.26  | 0.02      | 0.02  | 0.03  |
| 13          | 1  | -0.03     | 0.00  | -0.05 | 0.03      | 0.00  | 0.03  | 0.13      | 0.00  | 0.17  |
| 14          | 1  | -0.08     | 0.04  | -0.04 | 0.05      | -0.04 | 0.04  | 0.04      | 0.18  | -0.25 |
| 15          | 1  | -0.08     | -0.04 | -0.04 | 0.05      | 0.04  | 0.04  | 0.04      | -0.18 | -0.25 |
| 16          | 6  | 0.00      | 0.01  | 0.04  | 0.00      | -0.01 | -0.04 | 0.00      | -0.01 | 0.01  |
| 17          | 6  | 0.00      | -0.02 | -0.01 | 0.00      | -0.01 | -0.01 | 0.00      | -0.01 | 0.02  |
| 18          | 1  | 0.21      | -0.03 | -0.26 | -0.22     | 0.03  | 0.26  | -0.02     | 0.02  | 0.03  |
| 19          | 1  | -0.21     | -0.03 | -0.26 | 0.22      | 0.03  | 0.26  | 0.02      | 0.02  | 0.03  |
| 20          | 1  | 0.00      | 0.03  | 0.05  | 0.00      | 0.03  | 0.03  | 0.00      | 0.13  | 0.17  |
| 21          | 1  | -0.04     | 0.08  | 0.04  | -0.04     | 0.05  | 0.04  | 0.18      | 0.04  | -0.25 |
| 22          | 1  | 0.04      | 0.08  | 0.04  | 0.04      | 0.05  | 0.04  | -0.18     | 0.04  | -0.25 |
| 23          | 6  | 0.01      | 0.00  | -0.04 | 0.01      | 0.00  | -0.04 | 0.01      | 0.00  | 0.01  |
| 24          | 6  | -0.02     | 0.00  | 0.01  | 0.01      | 0.00  | -0.01 | 0.01      | 0.00  | 0.02  |
| 25          | 1  | -0.03     | 0.21  | 0.26  | -0.03     | 0.22  | 0.26  | -0.02     | 0.02  | 0.03  |
| 26          | 1  | -0.03     | -0.21 | 0.26  | -0.03     | -0.22 | 0.26  | -0.02     | -0.02 | 0.03  |
| 27          | 1  | 0.03      | 0.00  | -0.05 | -0.03     | 0.00  | 0.03  | -0.13     | 0.00  | 0.17  |
| 28          | 1  | 0.08      | -0.04 | -0.04 | -0.05     | 0.04  | 0.04  | -0.04     | -0.18 | -0.25 |
| 29          | 1  | 0.08      | 0.04  | -0.04 | -0.05     | -0.04 | 0.04  | -0.04     | 0.18  | -0.25 |

| 55          |    |           |       | 56    |           |       | 57    |           |       |       |
|-------------|----|-----------|-------|-------|-----------|-------|-------|-----------|-------|-------|
| E           |    |           |       | E     |           |       | A1    |           |       |       |
| Frequencies | -- | 1512.7431 |       |       | 1512.7432 |       |       | 1518.4343 |       |       |
| Red. masses | -- | 1.0440    |       |       | 1.0440    |       |       | 1.0455    |       |       |
| Frc consts  | -- | 1.4077    |       |       | 1.4077    |       |       | 1.4203    |       |       |
| IR Inten    | -- | 5.5431    |       |       | 5.5431    |       |       | 0.0000    |       |       |
| Atom AN     |    | X         | Y     | Z     | X         | Y     | Z     | X         | Y     | Z     |
| 1           | 15 | 0.00      | 0.00  | 0.00  | 0.00      | 0.00  | 0.00  | 0.00      | 0.00  | 0.00  |
| 2           | 6  | 0.00      | 0.00  | 0.00  | 0.00      | -0.02 | -0.01 | 0.00      | 0.01  | 0.01  |
| 3           | 6  | 0.00      | 0.00  | -0.01 | 0.00      | -0.01 | -0.03 | 0.00      | 0.01  | 0.02  |
| 4           | 1  | 0.00      | 0.00  | 0.00  | 0.01      | 0.04  | 0.01  | -0.02     | -0.03 | -0.02 |
| 5           | 1  | 0.00      | 0.02  | 0.00  | -0.01     | 0.03  | 0.01  | 0.02      | -0.03 | -0.02 |
| 6           | 1  | 0.02      | 0.04  | -0.05 | -0.01     | 0.16  | -0.22 | 0.00      | -0.11 | 0.15  |
| 7           | 1  | 0.07      | 0.02  | 0.09  | 0.26      | 0.03  | 0.35  | -0.19     | -0.02 | -0.26 |
| 8           | 1  | -0.06     | -0.01 | 0.08  | -0.26     | 0.04  | 0.36  | 0.19      | -0.02 | -0.26 |
| 9           | 6  | -0.02     | 0.00  | 0.01  | 0.00      | 0.00  | 0.00  | 0.01      | 0.00  | -0.01 |
| 10          | 6  | -0.01     | 0.00  | 0.03  | 0.00      | 0.00  | -0.01 | 0.01      | 0.00  | -0.02 |
| 11          | 1  | 0.03      | 0.01  | -0.01 | -0.02     | 0.00  | 0.00  | -0.03     | -0.02 | 0.02  |
| 12          | 1  | 0.04      | -0.01 | -0.01 | 0.00      | 0.00  | 0.00  | -0.03     | 0.02  | 0.02  |
| 13          | 1  | 0.16      | 0.01  | 0.22  | -0.04     | 0.02  | -0.05 | -0.11     | 0.00  | -0.15 |
| 14          | 1  | 0.04      | 0.26  | -0.36 | 0.01      | -0.06 | 0.08  | -0.02     | -0.19 | 0.26  |
| 15          | 1  | 0.03      | -0.26 | -0.35 | -0.02     | 0.07  | 0.09  | -0.02     | 0.19  | 0.26  |
| 16          | 6  | 0.00      | 0.00  | 0.00  | 0.00      | -0.02 | 0.01  | 0.00      | -0.01 | 0.01  |
| 17          | 6  | 0.00      | 0.00  | 0.01  | 0.00      | -0.01 | 0.03  | 0.00      | -0.01 | 0.02  |
| 18          | 1  | 0.00      | 0.00  | 0.00  | 0.01      | 0.04  | -0.01 | 0.02      | 0.03  | -0.02 |
| 19          | 1  | 0.00      | 0.02  | 0.00  | -0.01     | 0.03  | -0.01 | -0.02     | 0.03  | -0.02 |
| 20          | 1  | 0.02      | 0.04  | 0.05  | -0.01     | 0.16  | 0.22  | 0.00      | 0.11  | 0.15  |
| 21          | 1  | 0.07      | 0.02  | -0.09 | 0.26      | 0.03  | -0.35 | 0.19      | 0.02  | -0.26 |
| 22          | 1  | -0.06     | -0.01 | -0.08 | -0.26     | 0.04  | -0.36 | -0.19     | 0.02  | -0.26 |
| 23          | 6  | -0.02     | 0.00  | -0.01 | 0.00      | 0.00  | 0.00  | -0.01     | 0.00  | -0.01 |
| 24          | 6  | -0.01     | 0.00  | -0.03 | 0.00      | 0.00  | 0.01  | -0.01     | 0.00  | -0.02 |
| 25          | 1  | 0.03      | 0.01  | 0.01  | -0.02     | 0.00  | 0.00  | 0.03      | 0.02  | 0.02  |
| 26          | 1  | 0.04      | -0.01 | 0.01  | 0.00      | 0.00  | 0.00  | 0.03      | -0.02 | 0.02  |
| 27          | 1  | 0.16      | 0.01  | -0.22 | -0.04     | 0.02  | 0.05  | 0.11      | 0.00  | -0.15 |
| 28          | 1  | 0.04      | 0.26  | 0.36  | 0.01      | -0.06 | -0.08 | 0.02      | 0.19  | 0.26  |
| 29          | 1  | 0.03      | -0.26 | 0.35  | -0.02     | 0.07  | -0.09 | 0.02      | -0.19 | 0.26  |

|             |    | 58        |       |       | 59        |       |       | 60        |       |       |
|-------------|----|-----------|-------|-------|-----------|-------|-------|-----------|-------|-------|
|             |    | A2        |       |       | B1        |       |       | E         |       |       |
| Frequencies | -- | 1518.9909 |       |       | 1521.7948 |       |       | 1522.7254 |       |       |
| Red. masses | -- | 1.0366    |       |       | 1.0348    |       |       | 1.0356    |       |       |
| Frc consts  | -- | 1.4092    |       |       | 1.4119    |       |       | 1.4147    |       |       |
| IR Inten    | -- | 0.0000    |       |       | 0.0000    |       |       | 19.2580   |       |       |
| Atom AN     |    | X         | Y     | Z     | X         | Y     | Z     | X         | Y     | Z     |
| 1           | 15 | 0.00      | 0.00  | 0.00  | 0.00      | 0.00  | 0.00  | 0.00      | 0.00  | 0.00  |
| 2           | 6  | -0.01     | 0.00  | 0.00  | 0.01      | 0.00  | 0.00  | -0.01     | 0.00  | -0.01 |
| 3           | 6  | -0.02     | 0.00  | 0.00  | 0.02      | 0.00  | 0.00  | -0.02     | 0.00  | 0.00  |
| 4           | 1  | 0.00      | -0.02 | 0.01  | 0.00      | 0.03  | -0.01 | 0.04      | -0.03 | 0.05  |
| 5           | 1  | 0.00      | 0.02  | -0.01 | 0.00      | -0.03 | 0.01  | -0.04     | 0.02  | 0.04  |
| 6           | 1  | 0.35      | 0.00  | 0.00  | -0.35     | 0.00  | 0.00  | 0.30      | -0.01 | 0.01  |
| 7           | 1  | 0.02      | 0.24  | 0.09  | -0.02     | -0.24 | -0.08 | 0.01      | 0.21  | 0.06  |
| 8           | 1  | 0.02      | -0.24 | -0.09 | -0.02     | 0.24  | 0.08  | 0.03      | -0.21 | -0.09 |
| 9           | 6  | 0.00      | 0.01  | 0.00  | 0.00      | 0.01  | 0.00  | 0.00      | -0.01 | 0.00  |
| 10          | 6  | 0.00      | 0.02  | 0.00  | 0.00      | 0.02  | 0.00  | 0.00      | -0.03 | 0.00  |
| 11          | 1  | 0.02      | 0.00  | 0.01  | 0.03      | 0.00  | 0.01  | -0.03     | 0.03  | -0.05 |
| 12          | 1  | -0.02     | 0.00  | -0.01 | -0.03     | 0.00  | -0.01 | 0.02      | -0.03 | -0.02 |
| 13          | 1  | 0.00      | -0.35 | 0.00  | 0.00      | -0.35 | 0.00  | 0.00      | 0.38  | -0.01 |
| 14          | 1  | -0.24     | -0.02 | 0.09  | -0.24     | -0.02 | 0.08  | 0.26      | 0.02  | -0.08 |
| 15          | 1  | 0.24      | -0.02 | -0.09 | 0.24      | -0.02 | -0.08 | -0.26     | 0.04  | 0.10  |
| 16          | 6  | 0.01      | 0.00  | 0.00  | -0.01     | 0.00  | 0.00  | -0.01     | 0.00  | 0.01  |
| 17          | 6  | 0.02      | 0.00  | 0.00  | -0.02     | 0.00  | 0.00  | -0.02     | 0.00  | 0.00  |
| 18          | 1  | 0.00      | 0.02  | 0.01  | 0.00      | -0.03 | -0.01 | 0.04      | -0.03 | -0.05 |
| 19          | 1  | 0.00      | -0.02 | -0.01 | 0.00      | 0.03  | 0.01  | -0.04     | 0.02  | -0.04 |
| 20          | 1  | -0.35     | 0.00  | 0.00  | 0.35      | 0.00  | 0.00  | 0.30      | -0.01 | -0.01 |
| 21          | 1  | -0.02     | -0.24 | 0.09  | 0.02      | 0.24  | -0.08 | 0.01      | 0.21  | -0.06 |
| 22          | 1  | -0.02     | 0.24  | -0.09 | 0.02      | -0.24 | 0.08  | 0.03      | -0.21 | 0.09  |
| 23          | 6  | 0.00      | -0.01 | 0.00  | 0.00      | -0.01 | 0.00  | 0.00      | -0.01 | 0.00  |
| 24          | 6  | 0.00      | -0.02 | 0.00  | 0.00      | -0.02 | 0.00  | 0.00      | -0.03 | 0.00  |
| 25          | 1  | -0.02     | 0.00  | 0.01  | -0.03     | 0.00  | 0.01  | -0.03     | 0.03  | 0.05  |
| 26          | 1  | 0.02      | 0.00  | -0.01 | 0.03      | 0.00  | -0.01 | 0.02      | -0.03 | 0.02  |
| 27          | 1  | 0.00      | 0.35  | 0.00  | 0.00      | 0.35  | 0.00  | 0.00      | 0.38  | 0.01  |
| 28          | 1  | 0.24      | 0.02  | 0.09  | 0.24      | 0.02  | 0.08  | 0.26      | 0.02  | 0.08  |
| 29          | 1  | -0.24     | 0.02  | -0.09 | -0.24     | 0.02  | -0.08 | -0.26     | 0.04  | -0.10 |

|             |    | 61        |       |       | 62        |       |       | 63        |       |       |
|-------------|----|-----------|-------|-------|-----------|-------|-------|-----------|-------|-------|
|             |    | E         |       |       | E         |       |       | E         |       |       |
| Frequencies | -- | 1522.7254 |       |       | 3085.6128 |       |       | 3085.6128 |       |       |
| Red. masses | -- | 1.0356    |       |       | 1.0522    |       |       | 1.0522    |       |       |
| Frc consts  | -- | 1.4147    |       |       | 5.9026    |       |       | 5.9026    |       |       |
| IR Inten    | -- | 19.2580   |       |       | 0.7259    |       |       | 0.7259    |       |       |
| Atom AN     |    | X         | Y     | Z     | X         | Y     | Z     | X         | Y     | Z     |
| 1           | 15 | 0.00      | 0.00  | 0.00  | 0.00      | 0.00  | 0.00  | 0.00      | 0.00  | 0.00  |
| 2           | 6  | -0.01     | 0.00  | 0.00  | 0.00      | 0.00  | -0.01 | 0.00      | 0.00  | 0.04  |
| 3           | 6  | -0.03     | 0.00  | 0.00  | 0.00      | 0.00  | 0.00  | 0.00      | 0.02  | -0.02 |
| 4           | 1  | -0.03     | -0.02 | -0.02 | -0.08     | -0.01 | 0.05  | 0.31      | 0.02  | -0.22 |
| 5           | 1  | 0.03      | 0.03  | -0.05 | 0.09      | -0.01 | 0.07  | -0.31     | 0.02  | -0.21 |
| 6           | 1  | 0.38      | 0.00  | -0.01 | 0.00      | 0.04  | 0.03  | 0.00      | -0.14 | -0.13 |
| 7           | 1  | 0.04      | 0.26  | 0.10  | 0.07      | 0.01  | -0.05 | -0.21     | -0.02 | 0.15  |
| 8           | 1  | 0.02      | -0.26 | -0.08 | -0.05     | 0.00  | -0.04 | 0.22      | -0.02 | 0.15  |
| 9           | 6  | 0.00      | 0.01  | 0.01  | 0.00      | 0.00  | -0.04 | 0.00      | 0.00  | -0.01 |
| 10          | 6  | 0.00      | 0.02  | 0.00  | 0.02      | 0.00  | 0.02  | 0.00      | 0.00  | 0.00  |
| 11          | 1  | 0.02      | 0.04  | -0.04 | 0.02      | 0.31  | 0.21  | 0.01      | 0.09  | 0.07  |
| 12          | 1  | -0.03     | -0.04 | -0.05 | 0.02      | -0.31 | 0.22  | 0.01      | -0.08 | 0.05  |
| 13          | 1  | -0.01     | -0.30 | -0.01 | -0.14     | 0.00  | 0.13  | -0.04     | 0.00  | 0.03  |
| 14          | 1  | -0.21     | -0.03 | 0.09  | -0.02     | -0.22 | -0.15 | 0.00      | -0.05 | -0.04 |
| 15          | 1  | 0.21      | -0.01 | -0.06 | -0.02     | 0.21  | -0.15 | -0.01     | 0.07  | -0.05 |
| 16          | 6  | -0.01     | 0.00  | 0.00  | 0.00      | 0.00  | 0.01  | 0.00      | 0.00  | -0.04 |
| 17          | 6  | -0.03     | 0.00  | 0.00  | 0.00      | 0.00  | 0.00  | 0.00      | 0.02  | 0.02  |
| 18          | 1  | -0.03     | -0.02 | 0.02  | -0.08     | -0.01 | -0.05 | 0.31      | 0.02  | 0.22  |
| 19          | 1  | 0.03      | 0.03  | 0.05  | 0.09      | -0.01 | -0.07 | -0.31     | 0.02  | 0.21  |
| 20          | 1  | 0.38      | 0.00  | 0.01  | 0.00      | 0.04  | -0.03 | 0.00      | -0.14 | 0.13  |
| 21          | 1  | 0.04      | 0.26  | -0.10 | 0.07      | 0.01  | 0.05  | -0.21     | -0.02 | -0.15 |
| 22          | 1  | 0.02      | -0.26 | 0.08  | -0.05     | 0.00  | 0.04  | 0.22      | -0.02 | -0.15 |
| 23          | 6  | 0.00      | 0.01  | -0.01 | 0.00      | 0.00  | 0.04  | 0.00      | 0.00  | 0.01  |
| 24          | 6  | 0.00      | 0.02  | 0.00  | 0.02      | 0.00  | -0.02 | 0.00      | 0.00  | 0.00  |
| 25          | 1  | 0.02      | 0.04  | 0.04  | 0.02      | 0.31  | -0.21 | 0.01      | 0.09  | -0.07 |
| 26          | 1  | -0.03     | -0.04 | 0.05  | 0.02      | -0.31 | -0.22 | 0.01      | -0.08 | -0.05 |
| 27          | 1  | -0.01     | -0.30 | 0.01  | -0.14     | 0.00  | -0.13 | -0.04     | 0.00  | -0.03 |
| 28          | 1  | -0.21     | -0.03 | -0.09 | -0.02     | -0.22 | 0.15  | 0.00      | -0.05 | 0.04  |
| 29          | 1  | 0.21      | -0.01 | 0.06  | -0.02     | 0.21  | 0.15  | -0.01     | 0.07  | 0.05  |



| 64          |    |           |       | 65    |           |       | 66    |           |       |       |
|-------------|----|-----------|-------|-------|-----------|-------|-------|-----------|-------|-------|
| B2          |    |           |       | A1    |           |       | A1    |           |       |       |
| Frequencies | -- | 3085.9152 |       |       | 3087.4709 |       |       | 3089.4737 |       |       |
| Red. masses | -- | 1.0486    |       |       | 1.0457    |       |       | 1.0500    |       |       |
| Frc consts  | -- | 5.8836    |       |       | 5.8729    |       |       | 5.9050    |       |       |
| IR Inten    | -- | 8.1496    |       |       | 0.0000    |       |       | 0.0000    |       |       |
| Atom AN     |    | X         | Y     | Z     | X         | Y     | Z     | X         | Y     | Z     |
| 1           | 15 | 0.00      | 0.00  | 0.00  | 0.00      | 0.00  | 0.00  | 0.00      | 0.00  | 0.00  |
| 2           | 6  | 0.00      | 0.00  | -0.02 | 0.00      | 0.00  | 0.02  | 0.00      | 0.00  | -0.03 |
| 3           | 6  | 0.00      | -0.01 | 0.01  | 0.00      | 0.02  | -0.01 | 0.00      | 0.01  | -0.01 |
| 4           | 1  | -0.19     | -0.01 | 0.14  | 0.17      | 0.01  | -0.12 | -0.23     | -0.02 | 0.16  |
| 5           | 1  | 0.19      | -0.01 | 0.14  | -0.17     | 0.01  | -0.12 | 0.23      | -0.02 | 0.16  |
| 6           | 1  | 0.00      | 0.13  | 0.11  | 0.00      | -0.15 | -0.13 | 0.00      | -0.12 | -0.11 |
| 7           | 1  | 0.19      | 0.02  | -0.13 | -0.21     | -0.02 | 0.14  | -0.14     | -0.01 | 0.10  |
| 8           | 1  | -0.19     | 0.02  | -0.13 | 0.21      | -0.02 | 0.14  | 0.14      | -0.01 | 0.10  |
| 9           | 6  | 0.00      | 0.00  | -0.02 | 0.00      | 0.00  | -0.02 | 0.00      | 0.00  | 0.03  |
| 10          | 6  | 0.01      | 0.00  | 0.01  | 0.02      | 0.00  | 0.01  | 0.01      | 0.00  | 0.01  |
| 11          | 1  | 0.01      | 0.19  | 0.14  | 0.01      | 0.17  | 0.12  | -0.02     | -0.23 | -0.16 |
| 12          | 1  | 0.01      | -0.19 | 0.14  | 0.01      | -0.17 | 0.12  | -0.02     | 0.23  | -0.16 |
| 13          | 1  | -0.13     | 0.00  | 0.11  | -0.15     | 0.00  | 0.13  | -0.12     | 0.00  | 0.11  |
| 14          | 1  | -0.02     | -0.19 | -0.13 | -0.02     | -0.21 | -0.14 | -0.01     | -0.14 | -0.10 |
| 15          | 1  | -0.02     | 0.19  | -0.13 | -0.02     | 0.21  | -0.14 | -0.01     | 0.14  | -0.10 |
| 16          | 6  | 0.00      | 0.00  | -0.02 | 0.00      | 0.00  | 0.02  | 0.00      | 0.00  | -0.03 |
| 17          | 6  | 0.00      | 0.01  | 0.01  | 0.00      | -0.02 | -0.01 | 0.00      | -0.01 | -0.01 |
| 18          | 1  | 0.19      | 0.01  | 0.14  | -0.17     | -0.01 | -0.12 | 0.23      | 0.02  | 0.16  |
| 19          | 1  | -0.19     | 0.01  | 0.14  | 0.17      | -0.01 | -0.12 | -0.23     | 0.02  | 0.16  |
| 20          | 1  | 0.00      | -0.13 | 0.11  | 0.00      | 0.15  | -0.13 | 0.00      | 0.12  | -0.11 |
| 21          | 1  | -0.19     | -0.02 | -0.13 | 0.21      | 0.02  | 0.14  | 0.14      | 0.01  | 0.10  |
| 22          | 1  | 0.19      | -0.02 | -0.13 | -0.21     | 0.02  | 0.14  | -0.14     | 0.01  | 0.10  |
| 23          | 6  | 0.00      | 0.00  | -0.02 | 0.00      | 0.00  | -0.02 | 0.00      | 0.00  | 0.03  |
| 24          | 6  | -0.01     | 0.00  | 0.01  | -0.02     | 0.00  | 0.01  | -0.01     | 0.00  | 0.01  |
| 25          | 1  | -0.01     | -0.19 | 0.14  | -0.01     | -0.17 | 0.12  | 0.02      | 0.23  | -0.16 |
| 26          | 1  | -0.01     | 0.19  | 0.14  | -0.01     | 0.17  | 0.12  | 0.02      | -0.23 | -0.16 |
| 27          | 1  | 0.13      | 0.00  | 0.11  | 0.15      | 0.00  | 0.13  | 0.12      | 0.00  | 0.11  |
| 28          | 1  | 0.02      | 0.19  | -0.13 | 0.02      | 0.21  | -0.14 | 0.01      | 0.14  | -0.10 |
| 29          | 1  | 0.02      | -0.19 | -0.13 | 0.02      | -0.21 | -0.14 | 0.01      | -0.14 | -0.10 |

|             |    | 67        |       |       | 68        |       |       | 69        |       |       |
|-------------|----|-----------|-------|-------|-----------|-------|-------|-----------|-------|-------|
|             |    | E         |       |       | E         |       |       | B2        |       |       |
| Frequencies | -- | 3090.6373 |       |       | 3090.6373 |       |       | 3094.6099 |       |       |
| Red. masses | -- | 1.0431    |       |       | 1.0431    |       |       | 1.0468    |       |       |
| Frc consts  | -- | 5.8702    |       |       | 5.8702    |       |       | 5.9064    |       |       |
| IR Inten    | -- | 9.6362    |       |       | 9.6362    |       |       | 3.7701    |       |       |
| Atom AN     |    | X         | Y     | Z     | X         | Y     | Z     | X         | Y     | Z     |
| 1           | 15 | 0.00      | 0.00  | 0.00  | 0.00      | 0.00  | 0.00  | 0.00      | 0.00  | 0.00  |
| 2           | 6  | 0.00      | 0.00  | -0.01 | 0.00      | 0.00  | -0.03 | 0.00      | 0.00  | 0.02  |
| 3           | 6  | 0.00      | 0.01  | -0.01 | 0.00      | 0.02  | -0.01 | 0.00      | -0.01 | 0.01  |
| 4           | 1  | -0.09     | -0.01 | 0.07  | -0.23     | -0.02 | 0.16  | 0.21      | 0.01  | -0.15 |
| 5           | 1  | 0.07      | -0.01 | 0.05  | 0.24      | -0.02 | 0.17  | -0.21     | 0.01  | -0.15 |
| 6           | 1  | 0.00      | -0.08 | -0.07 | 0.00      | -0.22 | -0.19 | 0.00      | 0.15  | 0.13  |
| 7           | 1  | -0.08     | -0.01 | 0.06  | -0.26     | -0.02 | 0.18  | 0.16      | 0.01  | -0.11 |
| 8           | 1  | 0.10      | -0.01 | 0.07  | 0.25      | -0.02 | 0.18  | -0.16     | 0.01  | -0.11 |
| 9           | 6  | 0.00      | 0.00  | -0.03 | 0.00      | 0.00  | 0.01  | 0.00      | 0.00  | 0.02  |
| 10          | 6  | -0.02     | 0.00  | -0.01 | 0.01      | 0.00  | 0.01  | 0.01      | 0.00  | 0.01  |
| 11          | 1  | 0.02      | 0.24  | 0.17  | -0.01     | -0.07 | -0.05 | -0.01     | -0.21 | -0.15 |
| 12          | 1  | 0.02      | -0.23 | 0.16  | -0.01     | 0.09  | -0.07 | -0.01     | 0.21  | -0.15 |
| 13          | 1  | 0.22      | 0.00  | -0.19 | -0.08     | 0.00  | 0.07  | -0.15     | 0.00  | 0.13  |
| 14          | 1  | 0.02      | 0.25  | 0.18  | -0.01     | -0.10 | -0.07 | -0.01     | -0.16 | -0.11 |
| 15          | 1  | 0.02      | -0.26 | 0.18  | -0.01     | 0.08  | -0.06 | -0.01     | 0.16  | -0.11 |
| 16          | 6  | 0.00      | 0.00  | 0.01  | 0.00      | 0.00  | 0.03  | 0.00      | 0.00  | 0.02  |
| 17          | 6  | 0.00      | 0.01  | 0.01  | 0.00      | 0.02  | 0.01  | 0.00      | 0.01  | 0.01  |
| 18          | 1  | -0.09     | -0.01 | -0.07 | -0.23     | -0.02 | -0.16 | -0.21     | -0.01 | -0.15 |
| 19          | 1  | 0.07      | -0.01 | -0.05 | 0.24      | -0.02 | -0.17 | 0.21      | -0.01 | -0.15 |
| 20          | 1  | 0.00      | -0.08 | 0.07  | 0.00      | -0.22 | 0.19  | 0.00      | -0.15 | 0.13  |
| 21          | 1  | -0.08     | -0.01 | -0.06 | -0.26     | -0.02 | -0.18 | -0.16     | -0.01 | -0.11 |
| 22          | 1  | 0.10      | -0.01 | -0.07 | 0.25      | -0.02 | -0.18 | 0.16      | -0.01 | -0.11 |
| 23          | 6  | 0.00      | 0.00  | 0.03  | 0.00      | 0.00  | -0.01 | 0.00      | 0.00  | 0.02  |
| 24          | 6  | -0.02     | 0.00  | 0.01  | 0.01      | 0.00  | -0.01 | -0.01     | 0.00  | 0.01  |
| 25          | 1  | 0.02      | 0.24  | -0.17 | -0.01     | -0.07 | 0.05  | 0.01      | 0.21  | -0.15 |
| 26          | 1  | 0.02      | -0.23 | -0.16 | -0.01     | 0.09  | 0.07  | 0.01      | -0.21 | -0.15 |
| 27          | 1  | 0.22      | 0.00  | 0.19  | -0.08     | 0.00  | -0.07 | 0.15      | 0.00  | 0.13  |
| 28          | 1  | 0.02      | 0.25  | -0.18 | -0.01     | -0.10 | 0.07  | 0.01      | 0.16  | -0.11 |
| 29          | 1  | 0.02      | -0.26 | -0.18 | -0.01     | 0.08  | 0.06  | 0.01      | -0.16 | -0.11 |

|             | 70 |           |       | 71    |           |       | 72    |           |       |       |
|-------------|----|-----------|-------|-------|-----------|-------|-------|-----------|-------|-------|
|             | B1 |           |       | A2    |           |       | E     |           |       |       |
| Frequencies | -- | 3138.3130 |       |       | 3140.9772 |       |       | 3142.2991 |       |       |
| Red. masses | -- | 1.1039    |       |       | 1.1016    |       |       | 1.1023    |       |       |
| Frc consts  | -- | 6.4059    |       |       | 6.4033    |       |       | 6.4125    |       |       |
| IR Inten    | -- | 0.0000    |       |       | 0.0000    |       |       | 0.8935    |       |       |
| Atom AN     | X  | Y         | Z     | X     | Y         | Z     | X     | Y         | Z     |       |
| 1           | 15 | 0.00      | 0.00  | 0.00  | 0.00      | 0.00  | 0.00  | 0.00      | 0.00  |       |
| 2           | 6  | -0.04     | 0.00  | 0.00  | 0.05      | 0.00  | 0.00  | 0.04      | 0.00  |       |
| 3           | 6  | 0.01      | 0.00  | 0.00  | -0.01     | 0.00  | 0.00  | -0.01     | 0.00  |       |
| 4           | 1  | 0.27      | 0.02  | -0.20 | -0.28     | -0.02 | 0.21  | -0.22     | -0.02 | 0.17  |
| 5           | 1  | 0.27      | -0.02 | 0.20  | -0.28     | 0.02  | -0.21 | -0.22     | 0.02  | -0.17 |
| 6           | 1  | 0.00      | 0.00  | 0.00  | 0.00      | 0.00  | 0.00  | 0.00      | -0.02 | -0.02 |
| 7           | 1  | -0.08     | -0.01 | 0.06  | 0.04      | 0.00  | -0.03 | 0.05      | 0.00  | -0.03 |
| 8           | 1  | -0.08     | 0.01  | -0.06 | 0.04      | 0.00  | 0.03  | 0.06      | 0.00  | 0.04  |
| 9           | 6  | 0.00      | -0.04 | 0.00  | 0.00      | -0.05 | 0.00  | 0.00      | 0.05  | 0.00  |
| 10          | 6  | 0.00      | 0.01  | 0.00  | 0.00      | 0.01  | 0.00  | 0.00      | -0.01 | 0.00  |
| 11          | 1  | 0.02      | 0.27  | 0.20  | 0.02      | 0.28  | 0.21  | -0.02     | -0.32 | -0.24 |
| 12          | 1  | -0.02     | 0.27  | -0.20 | -0.02     | 0.28  | -0.21 | 0.02      | -0.31 | 0.24  |
| 13          | 1  | 0.00      | 0.00  | 0.00  | 0.00      | 0.00  | 0.00  | -0.01     | 0.00  | 0.01  |
| 14          | 1  | -0.01     | -0.08 | -0.06 | 0.00      | -0.04 | -0.03 | 0.01      | 0.07  | 0.05  |
| 15          | 1  | 0.01      | -0.08 | 0.06  | 0.00      | -0.04 | 0.03  | -0.01     | 0.08  | -0.06 |
| 16          | 6  | 0.04      | 0.00  | 0.00  | -0.05     | 0.00  | 0.00  | 0.04      | 0.00  | 0.00  |
| 17          | 6  | -0.01     | 0.00  | 0.00  | 0.01      | 0.00  | 0.00  | -0.01     | 0.00  | 0.00  |
| 18          | 1  | -0.27     | -0.02 | -0.20 | 0.28      | 0.02  | 0.21  | -0.22     | -0.02 | -0.17 |
| 19          | 1  | -0.27     | 0.02  | 0.20  | 0.28      | -0.02 | -0.21 | -0.22     | 0.02  | 0.17  |
| 20          | 1  | 0.00      | 0.00  | 0.00  | 0.00      | 0.00  | 0.00  | 0.00      | -0.02 | 0.02  |
| 21          | 1  | 0.08      | 0.01  | 0.06  | -0.04     | 0.00  | -0.03 | 0.05      | 0.00  | 0.03  |
| 22          | 1  | 0.08      | -0.01 | -0.06 | -0.04     | 0.00  | 0.03  | 0.06      | 0.00  | -0.04 |
| 23          | 6  | 0.00      | 0.04  | 0.00  | 0.00      | 0.05  | 0.00  | 0.00      | 0.05  | 0.00  |
| 24          | 6  | 0.00      | -0.01 | 0.00  | 0.00      | -0.01 | 0.00  | 0.00      | -0.01 | 0.00  |
| 25          | 1  | -0.02     | -0.27 | 0.20  | -0.02     | -0.28 | 0.21  | -0.02     | -0.32 | 0.24  |
| 26          | 1  | 0.02      | -0.27 | -0.20 | 0.02      | -0.28 | -0.21 | 0.02      | -0.31 | -0.24 |
| 27          | 1  | 0.00      | 0.00  | 0.00  | 0.00      | 0.00  | 0.00  | -0.01     | 0.00  | -0.01 |
| 28          | 1  | 0.01      | 0.08  | -0.06 | 0.00      | 0.04  | -0.03 | 0.01      | 0.07  | -0.05 |
| 29          | 1  | -0.01     | 0.08  | 0.06  | 0.00      | 0.04  | 0.03  | -0.01     | 0.08  | 0.06  |

|             |    | 73        |       |       | 74        |       |       | 75        |       |       |
|-------------|----|-----------|-------|-------|-----------|-------|-------|-----------|-------|-------|
|             |    | E         |       |       | A2        |       |       | E         |       |       |
| Frequencies | -- | 3142.2991 |       |       | 3178.1024 |       |       | 3179.4117 |       |       |
| Red. masses | -- | 1.1023    |       |       | 1.1033    |       |       | 1.1031    |       |       |
| Frc consts  | -- | 6.4125    |       |       | 6.5657    |       |       | 6.5702    |       |       |
| IR Inten    | -- | 0.8935    |       |       | 0.0000    |       |       | 11.7708   |       |       |
| Atom AN     |    | X         | Y     | Z     | X         | Y     | Z     | X         | Y     | Z     |
| 1           | 15 | 0.00      | 0.00  | 0.00  | 0.00      | 0.00  | 0.00  | 0.00      | 0.00  | 0.00  |
| 2           | 6  | -0.05     | 0.00  | 0.00  | 0.01      | 0.00  | 0.00  | -0.02     | 0.00  | 0.00  |
| 3           | 6  | 0.01      | 0.00  | 0.00  | 0.05      | 0.00  | 0.00  | -0.06     | 0.00  | 0.00  |
| 4           | 1  | 0.31      | 0.02  | -0.24 | -0.04     | 0.00  | 0.03  | 0.09      | 0.01  | -0.07 |
| 5           | 1  | 0.32      | -0.02 | 0.24  | -0.04     | 0.00  | -0.03 | 0.09      | -0.01 | 0.07  |
| 6           | 1  | 0.00      | -0.01 | -0.01 | 0.01      | 0.00  | 0.00  | -0.02     | 0.00  | 0.00  |
| 7           | 1  | -0.08     | -0.01 | 0.06  | -0.28     | -0.03 | 0.20  | 0.39      | 0.04  | -0.28 |
| 8           | 1  | -0.07     | 0.01  | -0.05 | -0.28     | 0.03  | -0.20 | 0.39      | -0.04 | 0.28  |
| 9           | 6  | 0.00      | 0.04  | 0.00  | 0.00      | -0.01 | 0.00  | 0.00      | 0.00  | 0.00  |
| 10          | 6  | 0.00      | -0.01 | 0.00  | 0.00      | -0.05 | 0.00  | 0.00      | -0.01 | 0.00  |
| 11          | 1  | -0.02     | -0.22 | -0.17 | 0.00      | 0.04  | 0.03  | 0.00      | -0.01 | 0.00  |
| 12          | 1  | 0.02      | -0.22 | 0.17  | 0.00      | 0.04  | -0.03 | 0.00      | 0.02  | -0.01 |
| 13          | 1  | 0.02      | 0.00  | -0.02 | 0.00      | -0.01 | 0.00  | 0.01      | 0.00  | 0.00  |
| 14          | 1  | 0.00      | 0.06  | 0.04  | 0.03      | 0.28  | 0.20  | 0.00      | 0.03  | 0.02  |
| 15          | 1  | 0.00      | 0.05  | -0.03 | -0.03     | 0.28  | -0.20 | 0.00      | 0.03  | -0.02 |
| 16          | 6  | -0.05     | 0.00  | 0.00  | -0.01     | 0.00  | 0.00  | -0.02     | 0.00  | 0.00  |
| 17          | 6  | 0.01      | 0.00  | 0.00  | -0.05     | 0.00  | 0.00  | -0.06     | 0.00  | 0.00  |
| 18          | 1  | 0.31      | 0.02  | 0.24  | 0.04      | 0.00  | 0.03  | 0.09      | 0.01  | 0.07  |
| 19          | 1  | 0.32      | -0.02 | -0.24 | 0.04      | 0.00  | -0.03 | 0.09      | -0.01 | -0.07 |
| 20          | 1  | 0.00      | -0.01 | 0.01  | -0.01     | 0.00  | 0.00  | -0.02     | 0.00  | 0.00  |
| 21          | 1  | -0.08     | -0.01 | -0.06 | 0.28      | 0.03  | 0.20  | 0.39      | 0.04  | 0.28  |
| 22          | 1  | -0.07     | 0.01  | 0.05  | 0.28      | -0.03 | -0.20 | 0.39      | -0.04 | -0.28 |
| 23          | 6  | 0.00      | 0.04  | 0.00  | 0.00      | 0.01  | 0.00  | 0.00      | 0.00  | 0.00  |
| 24          | 6  | 0.00      | -0.01 | 0.00  | 0.00      | 0.05  | 0.00  | 0.00      | -0.01 | 0.00  |
| 25          | 1  | -0.02     | -0.22 | 0.17  | 0.00      | -0.04 | 0.03  | 0.00      | -0.01 | 0.00  |
| 26          | 1  | 0.02      | -0.22 | -0.17 | 0.00      | -0.04 | -0.03 | 0.00      | 0.02  | 0.01  |
| 27          | 1  | 0.02      | 0.00  | 0.02  | 0.00      | 0.01  | 0.00  | 0.01      | 0.00  | 0.00  |
| 28          | 1  | 0.00      | 0.06  | -0.04 | -0.03     | -0.28 | 0.20  | 0.00      | 0.03  | -0.02 |
| 29          | 1  | 0.00      | 0.05  | 0.03  | 0.03      | -0.28 | -0.20 | 0.00      | 0.03  | 0.02  |

| 76          |    |           |       | 77    |           |       | 78    |           |       |       |
|-------------|----|-----------|-------|-------|-----------|-------|-------|-----------|-------|-------|
| E           |    |           |       | B1    |           |       | A1    |           |       |       |
| Frequencies | -- | 3179.4117 |       |       | 3180.1623 |       |       | 3185.3734 |       |       |
| Red. masses | -- | 1.1031    |       |       | 1.1033    |       |       | 1.1026    |       |       |
| Frc consts  | -- | 6.5702    |       |       | 6.5743    |       |       | 6.5915    |       |       |
| IR Inten    | -- | 11.7708   |       |       | 0.0000    |       |       | 0.0000    |       |       |
| Atom AN     |    | X         | Y     | Z     | X         | Y     | Z     | X         | Y     | Z     |
| 1           | 15 | 0.00      | 0.00  | 0.00  | 0.00      | 0.00  | 0.00  | 0.00      | 0.00  | 0.00  |
| 2           | 6  | 0.00      | 0.00  | 0.00  | -0.01     | 0.00  | 0.00  | 0.00      | 0.00  | 0.00  |
| 3           | 6  | -0.01     | 0.00  | 0.00  | -0.04     | 0.00  | 0.00  | 0.00      | 0.02  | 0.04  |
| 4           | 1  | 0.02      | 0.00  | -0.01 | 0.08      | 0.01  | -0.06 | 0.01      | 0.00  | -0.01 |
| 5           | 1  | -0.01     | 0.00  | 0.00  | 0.08      | -0.01 | 0.06  | -0.01     | 0.00  | -0.01 |
| 6           | 1  | 0.00      | -0.01 | 0.00  | -0.01     | 0.00  | 0.00  | 0.00      | -0.33 | -0.28 |
| 7           | 1  | 0.03      | 0.00  | -0.02 | 0.27      | 0.03  | -0.20 | 0.15      | 0.02  | -0.10 |
| 8           | 1  | 0.03      | 0.00  | 0.02  | 0.27      | -0.03 | 0.20  | -0.15     | 0.02  | -0.10 |
| 9           | 6  | 0.00      | 0.02  | 0.00  | 0.00      | -0.01 | 0.00  | 0.00      | 0.00  | 0.00  |
| 10          | 6  | 0.00      | 0.06  | 0.00  | 0.00      | -0.04 | 0.00  | 0.02      | 0.00  | -0.04 |
| 11          | 1  | -0.01     | -0.09 | -0.07 | 0.01      | 0.08  | 0.06  | 0.00      | 0.01  | 0.01  |
| 12          | 1  | 0.01      | -0.09 | 0.07  | -0.01     | 0.08  | -0.06 | 0.00      | -0.01 | 0.01  |
| 13          | 1  | 0.00      | 0.02  | 0.00  | 0.00      | -0.01 | 0.00  | -0.33     | 0.00  | 0.28  |
| 14          | 1  | -0.04     | -0.39 | -0.28 | 0.03      | 0.27  | 0.20  | 0.02      | 0.15  | 0.10  |
| 15          | 1  | 0.04      | -0.39 | 0.28  | -0.03     | 0.27  | -0.20 | 0.02      | -0.15 | 0.10  |
| 16          | 6  | 0.00      | 0.00  | 0.00  | 0.01      | 0.00  | 0.00  | 0.00      | 0.00  | 0.00  |
| 17          | 6  | -0.01     | 0.00  | 0.00  | 0.04      | 0.00  | 0.00  | 0.00      | -0.02 | 0.04  |
| 18          | 1  | 0.02      | 0.00  | 0.01  | -0.08     | -0.01 | -0.06 | -0.01     | 0.00  | -0.01 |
| 19          | 1  | -0.01     | 0.00  | 0.00  | -0.08     | 0.01  | 0.06  | 0.01      | 0.00  | -0.01 |
| 20          | 1  | 0.00      | -0.01 | 0.00  | 0.01      | 0.00  | 0.00  | 0.00      | 0.33  | -0.28 |
| 21          | 1  | 0.03      | 0.00  | 0.02  | -0.27     | -0.03 | -0.20 | -0.15     | -0.02 | -0.10 |
| 22          | 1  | 0.03      | 0.00  | -0.02 | -0.27     | 0.03  | 0.20  | 0.15      | -0.02 | -0.10 |
| 23          | 6  | 0.00      | 0.02  | 0.00  | 0.00      | 0.01  | 0.00  | 0.00      | 0.00  | 0.00  |
| 24          | 6  | 0.00      | 0.06  | 0.00  | 0.00      | 0.04  | 0.00  | -0.02     | 0.00  | -0.04 |
| 25          | 1  | -0.01     | -0.09 | 0.07  | -0.01     | -0.08 | 0.06  | 0.00      | -0.01 | 0.01  |
| 26          | 1  | 0.01      | -0.09 | -0.07 | 0.01      | -0.08 | -0.06 | 0.00      | 0.01  | 0.01  |
| 27          | 1  | 0.00      | 0.02  | 0.00  | 0.00      | 0.01  | 0.00  | 0.33      | 0.00  | 0.28  |
| 28          | 1  | -0.04     | -0.39 | 0.28  | -0.03     | -0.27 | 0.20  | -0.02     | -0.15 | 0.10  |
| 29          | 1  | 0.04      | -0.39 | -0.28 | 0.03      | -0.27 | -0.20 | -0.02     | 0.15  | 0.10  |

|             | 79 |           |       | 80    |           |       | 81    |           |       |       |
|-------------|----|-----------|-------|-------|-----------|-------|-------|-----------|-------|-------|
|             | E  |           |       | E     |           |       | B2    |           |       |       |
| Frequencies | -- | 3185.6568 |       |       | 3185.6568 |       |       | 3185.7510 |       |       |
| Red. masses | -- | 1.1024    |       |       | 1.1024    |       |       | 1.1024    |       |       |
| Frc consts  | -- | 6.5916    |       |       | 6.5916    |       |       | 6.5921    |       |       |
| IR Inten    | -- | 0.2203    |       |       | 0.2203    |       |       | 3.8915    |       |       |
| Atom AN     | X  | Y         | Z     | X     | Y         | Z     | X     | Y         | Z     |       |
| 1           | 15 | 0.00      | 0.00  | 0.00  | 0.00      | 0.00  | 0.00  | 0.00      | 0.00  |       |
| 2           | 6  | 0.00      | 0.00  | 0.00  | 0.00      | 0.00  | 0.00  | 0.00      | 0.00  |       |
| 3           | 6  | 0.00      | 0.02  | 0.03  | 0.00      | -0.03 | -0.05 | 0.00      | 0.02  | 0.04  |
| 4           | 1  | 0.00      | 0.00  | 0.00  | -0.02     | 0.00  | 0.02  | 0.02      | 0.00  | -0.01 |
| 5           | 1  | -0.02     | 0.00  | -0.02 | 0.01      | 0.00  | 0.01  | -0.02     | 0.00  | -0.01 |
| 6           | 1  | 0.00      | -0.27 | -0.22 | 0.00      | 0.38  | 0.32  | 0.00      | -0.33 | -0.27 |
| 7           | 1  | 0.12      | 0.01  | -0.08 | -0.17     | -0.02 | 0.11  | 0.15      | 0.02  | -0.10 |
| 8           | 1  | -0.12     | 0.02  | -0.08 | 0.17      | -0.02 | 0.11  | -0.15     | 0.02  | -0.10 |
| 9           | 6  | 0.00      | 0.00  | 0.00  | 0.00      | 0.00  | 0.00  | 0.00      | 0.00  | 0.00  |
| 10          | 6  | -0.03     | 0.00  | 0.05  | -0.02     | 0.00  | 0.03  | -0.02     | 0.00  | 0.04  |
| 11          | 1  | 0.00      | -0.01 | -0.01 | 0.00      | -0.02 | -0.02 | 0.00      | -0.02 | -0.01 |
| 12          | 1  | 0.00      | 0.02  | -0.02 | 0.00      | 0.00  | 0.00  | 0.00      | 0.02  | -0.01 |
| 13          | 1  | 0.38      | 0.00  | -0.32 | 0.27      | 0.00  | -0.22 | 0.33      | 0.00  | -0.27 |
| 14          | 1  | -0.02     | -0.17 | -0.11 | -0.02     | -0.12 | -0.08 | -0.02     | -0.15 | -0.10 |
| 15          | 1  | -0.02     | 0.17  | -0.11 | -0.01     | 0.12  | -0.08 | -0.02     | 0.15  | -0.10 |
| 16          | 6  | 0.00      | 0.00  | 0.00  | 0.00      | 0.00  | 0.00  | 0.00      | 0.00  | 0.00  |
| 17          | 6  | 0.00      | 0.02  | -0.03 | 0.00      | -0.03 | 0.05  | 0.00      | -0.02 | 0.04  |
| 18          | 1  | 0.00      | 0.00  | 0.00  | -0.02     | 0.00  | -0.02 | -0.02     | 0.00  | -0.01 |
| 19          | 1  | -0.02     | 0.00  | 0.02  | 0.01      | 0.00  | -0.01 | 0.02      | 0.00  | -0.01 |
| 20          | 1  | 0.00      | -0.27 | 0.22  | 0.00      | 0.38  | -0.32 | 0.00      | 0.33  | -0.27 |
| 21          | 1  | 0.12      | 0.01  | 0.08  | -0.17     | -0.02 | -0.11 | -0.15     | -0.02 | -0.10 |
| 22          | 1  | -0.12     | 0.02  | 0.08  | 0.17      | -0.02 | -0.11 | 0.15      | -0.02 | -0.10 |
| 23          | 6  | 0.00      | 0.00  | 0.00  | 0.00      | 0.00  | 0.00  | 0.00      | 0.00  | 0.00  |
| 24          | 6  | -0.03     | 0.00  | -0.05 | -0.02     | 0.00  | -0.03 | 0.02      | 0.00  | 0.04  |
| 25          | 1  | 0.00      | -0.01 | 0.01  | 0.00      | -0.02 | 0.02  | 0.00      | 0.02  | -0.01 |
| 26          | 1  | 0.00      | 0.02  | 0.02  | 0.00      | 0.00  | 0.00  | 0.00      | -0.02 | -0.01 |
| 27          | 1  | 0.38      | 0.00  | 0.32  | 0.27      | 0.00  | 0.22  | -0.33     | 0.00  | -0.27 |
| 28          | 1  | -0.02     | -0.17 | 0.11  | -0.02     | -0.12 | 0.08  | 0.02      | 0.15  | -0.10 |
| 29          | 1  | -0.02     | 0.17  | 0.11  | -0.01     | 0.12  | 0.08  | 0.02      | -0.15 | -0.10 |
